# Supplementary material for: The flying spider-monkey tree fern genome provides insights into fern evolution and arborescence
Source: PubMed Central journal article supplement (PMC9122828; doi:10.1038/s41477-022-01146-6), 2022-05-09
Supplement: 41477_2022_1146_MOESM1_ESM.pdf [file 41477_2022_1146_MOESM1_ESM.pdf]

---

**Supplementary information**

---

**The flying spider-monkey tree fern genome provides insights into fern evolution and arborescence**

---

In the format provided by the authors and unedited

1 **Supplementary Information**

2

3 **The flying spider-monkey tree fern genome provides insights into fern evolution**  
4 **and arborescence**

5

6

7

8

9

10

11

12

13

14

15

16

17

18

19

20

21

22

23

## 24 **Supplementary text**

25

### 26 **Small RNA sequencing**

27 Three small RNA libraries were constructed using total RNAs isolated from young  
28 leaves as described before<sup>1</sup>. Libraries were sequenced on a Novaseq 6000 platform  
29 with a single-end read length of 50 bp. Clean reads were mapped to the *A. spinulosa*  
30 genome by Bowtie<sup>2</sup>, and known miRNAs were identified using miRBase 22.0  
31 database with miRDeep2<sup>3</sup>. Novel miRNAs were predicted by the combination of  
32 miREvo<sup>4</sup> and miRDeep2<sup>3</sup>.

33 We totally obtained 29.64 million clean reads of sRNA with length at 18-30 nt. Of  
34 which, 21 nt length of sRNA were the most abundant, occupying 34.72%  
35 (Supplementary Fig. 12). 9,561,080 (96.78%) reads could be mapped to the *A.*  
36 *spinulosa* genome. A total of 182 known and 181 novel miRNAs were identified  
37 (Supplementary Table 18) and their first nucleotides mainly trended to be uracil  
38 (Supplementary Fig. 12). The rRNA, tRNA, snRNA and snoRNA were predicted, and  
39 the percentage of rRNA was dominant, with 93.11% (Supplementary Table 19 and  
40 Supplementary Fig. 12). Three leaf samples shared a high correlation coefficient of  
41 miRNA TPM values ( $R^2 > 0.97$ ), indicating a quite good repeatability (Supplementary  
42 Fig. 12).

### 43 **Differential expression of homeologous genes and GO enrichment analysis**

44 Raw RNA-seq read counts from four tissues (stem, leaf, sorus and gametophyte) were  
45 normalized by DESeq2<sup>5</sup>. Log2 fold change (L2F) and base mean expression (BME)  
46 level were calculated for each gene across the 4 tissue types using DESeq2<sup>5</sup>.

47 Following normalization and differential expression analysis, differential  
48 expression data was extracted for syntenic gene pairs identified as belonging to the  
49 most recent WGD ( $K_s = 0.2-0.5$ ). Subsequently, BME and L2F in expression between  
50 tissue types were used to identify homoeologs that had diverged in expression  
51 following duplication. To identify gene pairs with divergent expression between tissue  
52 types we calculated the pairwise difference in L2F ( $\text{diffL2F} = |L2F\_1 - L2F\_2|$ ) between

53 homoeologs and selected pairs with a difference of at least 2, an arbitrary cutoff  
54 representing a 4 fold change in expression between the syntenic genes. To identify  
55 homoeologs with different levels of expression regardless of tissue type, pairs were  
56 filtered according to the log<sub>2</sub> fold change in base mean expression across all tissue  
57 types, i.e. “BME ratio” ( $BME\_ratio = \log_2(BME\_1/BME\_2)$ ). Finally, both BME\_ratio  
58 as well as diffL2F were compared between collinear blocks to look for evidence of  
59 expression bias between homologous sub genomes.

60 Out of 3,921 syntenic gene pairs with Ks between 0.2 and 0.5, 3,557 had at least  
61 one gene with a BME greater than 10 and were included in subsequent analyses. After  
62 filtering, 1,184 gene pairs showed a BME ratio greater than 2, indicative of  
63 differential expression regardless of tissue type and 141 pairs had one gene with a  
64 BME below 1 indicative of one homolog being silenced in all 4 tissues. A total of  
65 2,105 gene pairs exhibited differential expression in at least one comparison, and  
66 many pairs were differentially expressed in multiple comparisons with 136 gene pairs  
67 differentially expressed in all comparisons (Extended Data Fig. 3).

68 Datasets were constructed for GO enrichment using a custom Python script to filter  
69 the output of DESeq2 by difference in L2F expression between tissues as well as BME  
70 ratio. Pairwise tissue comparisons were collapsed to produce a non-redundant set of  
71 differentially expressed genes across all tissue types. Functional gene annotations were  
72 obtained using the EggNOG-mapper tool<sup>6</sup>. GO-term enrichment was conducted in  
73 TBtools<sup>7</sup> using the plant specific GO-slim ontology. GO-enrichment was first  
74 performed using the complete set of annotated genes as a background set. An additional  
75 analysis was also run using only syntenic genes in the background set to control for bias  
76 toward specific categories caused by differential retention of certain types of genes  
77 following WGD.

78 To examine which genes are preferentially kept following WGD, we carried out  
79 Gene Ontology (GO) enrichment analysis. When compared to a genome-wide  
80 background annotation, syntenic gene pairs from the recent WGD event ( $0.2 < Ks < 0.5$ )  
81 exhibited significant enrichment of transcription related genes in the molecular  
82 function category as well as various categories associated with development and

83 response to a range of environmental stimuli (Extended Data Fig. 3). This is in line  
84 with previous studies that have shown high retention rates of homoeologous genes in  
85 these GO categories following WGD events in *Arabidopsis thaliana*<sup>8</sup>.

86 When GO enrichment analysis was conducted on differentially expressed gene  
87 pairs using all syntenic genes as the background, we found that genes exhibiting tissue  
88 specific expression were highly enriched for transporter activity (p-value=0.0023)  
89 compared to other syntenic gene pairs (Extended Data Fig. 3).

90 GO enrichment analysis demonstrated that homoeologous genes with divergent  
91 expression were enriched in different GO categories than genes that did not exhibit  
92 tissue specific expression.

### 93 **Metabolite identification based on widely targeted metabolomics**

94 We exploited the technology of widely targeted metabolomics<sup>9</sup> from Metware  
95 Company (Wuhan, China) to investigate the metabolites in the leaves and stems of *A.*  
96 *spinulosa*. Leaves and stems at three developmental stages, collected from three  
97 individual trees, were freeze-dried and crushed using a mixer mill. Powder (100 mg)  
98 was extracted overnight at 4 °C with 70% methanol. The extracts were absorbed into a  
99 CNWBOND Carbon-GCB SPE cartridge (ANPEL), filtered through a 0.22 µm nylon  
100 syringe filter and analyzed using an LC-ESI-MS/MS system (HPLC, Shim-pack  
101 UFLC SHIMADZU CBM30A system; MS, Applied Biosystems 6500 Q TRAP). We  
102 conducted OPLS-DA (Orthogonality Partial Least Squares-Discriminant Analysis)<sup>10</sup>  
103 to obtain VIP (variable importance in project) values. All compounds were annotated  
104 in the KEGG<sup>11</sup> database and a self-built MetWare<sup>12</sup> database. The metabolites that  
105 have significantly differential contents in different tissues were identified using two  
106 cutoffs (VIP ≥1; FC (Fold Change) ≥2 or FC ≤0.5).

107 A total of 274 metabolites were identified, including 87 primary metabolites and  
108 187 secondary metabolites (Supplementary Fig. 8 and Supplementary Dataset 8).  
109 Secondary metabolites include 72 flavonoids, 29 phenylpropanoids and 11 alkaloids,  
110 etc, of which flavonoids were the most abundant, occupying 38.5% of secondary  
111 metabolites (Supplementary Fig. 8 and Supplementary Dataset 8). Some flavonoids

112 have application potential in pharmacology: for examples, quercetin could enhance  
113 antitumor activities of trichostatin A<sup>13</sup>, and eriodictyol had anti-inflammatory effects<sup>14</sup>.  
114 Most flavonoid compounds were detected at higher-level contents in leaves than in  
115 stems (Supplementary Fig. 8). Further by comparison of flavonoid contents in leaves  
116 with different developmental stages, 49 were significantly upregulated in old leaves  
117 compared to young leaves, such as naringenin (2.2 folds), eriodictyol (6.0 folds),  
118 apigenin 7-*O*-glucoside (49.1 folds) and kaempferol 3-*O*-galactoside (57.8 folds),  
119 indicating content accumulation of major flavonoids along with leaf development  
120 (Supplementary Fig. 8 and Supplementary Dataset 9). RNA-seq analysis of the 358  
121 gene models (Supplementary Dataset 10) in the 8 family (CHS, CHI, F3H, FLS, F3'H,  
122 F3'5'H, FNS and GT) of flavonoid pathway identified the genes that were specifically  
123 expressed in different tissues, supporting the flavonoid synthesis in leaves and stems  
124 (Supplementary Fig. 8).

#### 125 **Metabolite identification based on isolation and spectra**

126 Six kg of dried stem powder was extracted with ethanol to obtain a crude extract,  
127 which was further extracted successively in petroleum ether, ethyl acetate and  
128 *n*-butanol, followed by condensation, obtaining a petroleum ether extract (Fraction A,  
129 Fr. A), an ethyl acetate extract (Fraction B, Fr. B), and an *n*-butanol extract (Fraction  
130 C, Fr. C). We used different columns to separate these three fractions: a silica-gel  
131 column (100-200 and 200-300 mesh, Qingdao Marine Chemical) for Fr. A, an  
132 ODS-C18 column (50  $\mu$ m, YMC) for Fr. B, and a MCI HP20 column (Mitsubishi) for  
133 Fr. C. After elution with different solvents, i.e. CH<sub>2</sub>Cl<sub>2</sub>-MeOH (100:0→0:100, v/v)  
134 for Fr. A, MeOH (30%-100%) for Fr. B, and EtOH (30%-100%) for Fr.C), we  
135 obtained 40 fractions (Fr. A1-30, Fr. B1-6 and Fr. C1-C4). Fr. A8, Fr. B1 and Fr. B2  
136 were further separated by the Sephadex LH-20 column (18-110  $\mu$ m, GE healthcare)  
137 and eluted with MeOH, giving subfractions Fr. A8.1-A8.13, Fr. B1.1-B1.25, and Fr.  
138 B2.1-B2.30.

139 Eleven metabolites were purified from these fractions by semi-preparative HPLC  
140 on an Agilent C18 column (250  $\times$  10 mm I.D., 5  $\mu$ m) equipped with a LC-6AD pump

141 and a Shimadzu SPD-20A UV-Vis detector (Shimadzu) using MeOH-H<sub>2</sub>O as eluent.  
142 The structures of one novel metabolite alsophilin and ten metabolites were identified  
143 by MS and NMR spectra (Supplementary Fig.9). The optical rotations were recorded  
144 using a Rudolph Research Analytical automatic polarimeter (Rudolph). Its molecular  
145 formula was identified by high-resolution electrospray ionization mass spectrometry.  
146 UV spectrum was measured on a JASCO J-815 CD spectropolarimeter (JASCO). IR  
147 spectrum was acquired by KBr disk method on a Shimadzu FTIR-8400S spectrometer  
148 (Shimadzu). HPLC, equipped with a chiral column (Daicel Chiralpak IC) and using  
149 isopropanol and hexane (60:40) as eluent, was used to separate (-)-alsophilin and  
150 (+)-alsophilin from alsophilin. The absolute configurations of (±)-alsophilin were  
151 assigned by experimental and theoretical electronic circular dichroism (ECD)<sup>15</sup>. A  
152 conformational search was conducted using the MOE software with the MMFF94s  
153 force-field. All 34 conformers whose Boltzmann distribution was more than 1% were  
154 optimized at the B3LYP/6-311G (d,p) level in MeOH using a PCM solvent model  
155 with the Gaussian 16 program package. ECD calculations of all the conformers were  
156 run by the time-dependent density functional theory (TDDFT) at B3LYP/6-311g (d,p)  
157 level in MeOH with the PCM solvent model (Supplementary Table 20). The overall  
158 calculated ECD spectra were generated by Boltzmann weighting using SpecDis.  
159 Through isolation and identification of metabolites in the *A. spinulosa* stem, we  
160 obtained eleven compounds, including ten known and one novel. Of which, ten  
161 known compounds were identified by comparing their spectroscopic data with the  
162 reported data in the corresponding literatures as 3,4-dihydroxybenzalacetone (**2**)<sup>16,17</sup>,  
163 protocatechic aldehyde (**3**)<sup>17</sup>, vanillic acid (**4**)<sup>16</sup>, piceatannol (**5**)<sup>18,19</sup>, cyperusphenol B  
164 (**6**)<sup>19</sup>, cinnamtannin B-1 (**7**)<sup>20</sup>, jezonodione (**8**)<sup>18,20</sup>, davallialactone (**9**)<sup>21</sup>, cyathenosin  
165 A (**10**)<sup>22</sup>, 4-*O*-β-D-glucopyranosyl-*p*-coumaric acid (**11**)<sup>23</sup> (Extended Data Fig. 9).

### 166 **Characterization of alsophilin structure**

167 The novel compound, mentioned above, was named alsophilin. It was obtained as  
168 yellow amorphous powder with the molecular formula C<sub>27</sub>H<sub>20</sub>O<sub>9</sub> identified by  
169 high-resolution electrospray ionization mass spectrometry (HRESIMS,

170 Supplementary Fig. 9) at  $m/z$  489.1179 ( $[M+H]^+$ , calcd for  $C_{27}H_{21}O_9$ , 489.1180),  
171 requiring 18 degrees of unsaturation. UV and IR spectrum of ( $\pm$ )-alsophilin are shown  
172 in Supplementary Fig. 9. The  $^1H$  NMR spectrum (Supplementary Table 21 and  
173 Supplementary Fig. 9) exhibited the signals assignable to two 1,2,4-trisubstituted  
174 benzenes at  $\delta$  7.06 (d,  $J = 2.0$  Hz), 6.97 (dd,  $J = 8.5, 2.0$  Hz), 6.78 (d,  $J = 8.5$  Hz), and  
175 6.76 (d,  $J = 2.0$  Hz), 6.66 (dd,  $J = 8.5, 2.0$  Hz), 6.79 (d,  $J = 8.5$  Hz), a  
176 1,3,5-trisubstituted benzene at  $\delta$  6.12 (2H, d,  $J = 2.5$  Hz), 6.18 (t,  $J = 2.5$  Hz), a  
177 *trans*-1,2-disubstituted double bonds at  $\delta$  7.38 (d,  $J = 16.0$  Hz) and 6.70 (d,  $J = 16.0$   
178 Hz), an olefinic methine singlet proton attributable to  $\delta$  6.43, two aliphatic methine  
179 doublet protons at  $\delta$  5.43 (d,  $J = 6.5$  Hz) and 4.26 (d,  $J = 6.5$  Hz). In the  $^{13}C$  NMR  
180 spectrum, 27 carbons were observed (Supplementary Table 21 and Supplementary Fig.  
181 9), including one  $\alpha$ ,  $\beta$ -unsaturated ester carbon ( $\delta$ 163.1), eight oxygen-bearing  
182 aromatic or olefinic quaternary carbons ( $\delta$ 173.8, 164.9, 160.1 (2C), 148.9, 147.3,  
183 146.9, 146.8), four carbon-substituted aromatic or olefinic quaternary carbons ( $\delta$   
184 144.7, 132.5, 128.7, 103.8), 12 aromatic or olefinic methines ( $\delta$ 138.1, 122.2, 119.0,  
185 117.0, 116.6, 116.4, 114.9, 113.8, 106.7(2C), 102.6, 96.3), and two aliphatic methines  
186 ( $\delta$  97.8, 55.0) according to its  $^{13}C$  NMR and HSQC spectra (Supplementary Fig. 9).  
187 Above spectral data implied that ( $\pm$ )-alsophilin was a dimeric structure of hispidin<sup>24</sup>  
188 and piceatannol<sup>25</sup>. To confirm the structure and determine the connection mode of two  
189 monomer units, HMBC spectrum was examined (Supplementary Fig. 9). The  
190 long-range correlations from H-2 to C-4, C-6 and C-7, from H-5 to C-1 and C-3, from  
191 H-6 to C-2, C-4 and C-7, from H-7 to C-2, C-6 and C-9, from H-8 to C-1, C-9 and  
192 C-10, and from H-10 to C-8, C-11, C-12 and C-13 assigned the hispidin moiety. The  
193 key HMBC correlations from H-2' to C-4', C-6' and C-7', from H-5' to C-1' and C-3',  
194 from H-6' to C-2' and C-4', and from H-10'(14') to C-8' and C-12' confirmed the rings  
195 A and B of piceatannol. Other long-range correlations from H-7' to C-11, C-1', C-2',  
196 C-6', and C-9', from H-8' to C-11, C-12, C-13, C-1', C-9', and C-10'(14'), indicated  
197 the central position of C-7' and C-8', that were oxidized from the olefinic carbons in  
198 piceatannol moiety. Both of them connected the monomer units of rings A and B of  
199 piceatannol and ring C of hispidin. Thus, all protons and carbon resonances were



200 assigned and the planar structure of ( $\pm$ )-alsophilin was established.

201 The relative configuration of ( $\pm$ )-alsophilin is determined to be *trans* orientation  
202 between protons P7' and P8' from the key ROESY correlations between protons  
203 P7'/P10'(P14') and P8'/P2' observed in the ROESY spectrum (Supplementary Fig. 9).  
204 Next, the specific optical rotation and CD spectrum of alsophilin were examined.  
205 Though the CD spectrum showed cotton curves (Extended Data Fig. 6) but the  
206 rotatory value was nearly zero, suggesting ( $\pm$ )-alsophilin may be a pair of enantiomers  
207 with different amounts. The enantiomers, (+)-alsophilin and (-)-alsophilin were  
208 separated by Agilent 1260 (Agilent Technologies, USA) on a chiral column Daicel  
209 Chiralpak IC column (250  $\times$  4.6 mm I.D., 5  $\mu$ m, Daicel Chemical Industries, Ltd.,  
210 Japan). When we analyzed ( $\pm$ )-alsophilin, (+)-alsophilin and (-)-alsophilin on HPLC  
211 (CAPCELL PAK ADME column (150  $\times$  4.6 mm, 5  $\mu$ m); Mobile phase: 0min, 10% -  
212 30min, 50% - 35min, 100% ACN-H<sub>2</sub>O; Wavelength: 382 nm; Flow rate: 1.0 mL/min),  
213 they had the same retention time at 20.835 min. When we analyzed ( $\pm$ )-alsophilin,  
214 (+)-alsophilin and (-)-alsophilin on HPLC (Column: Daicel Chiralpak IC column  
215 (250  $\times$  4.6 mm, 5  $\mu$ m); Mobile phase: hexane-isopropanol (6:4); Wavelength: 382 nm;  
216 Flow rate: 1.0 mL/min), they had different retention time, displaying (+)-alsophilin  
217 (7.895 min), (-)-alsophilin (15.037 min) (Extended Data Fig. 6). The rotatory values  
218 of these two monomers were the inverse of each other, (-)-alsophilin:  $[\alpha]_D^{20}$  -13.5 (c  
219 0.2, MeOH); CD (c 0.1(w/v)%, MeOH) 211 (23.85), 245 (12.94), 285 (4.50), 380  
220 (-3.72) nm. (+)-alsophilin:  $[\alpha]_D^{20}$  8.5 (c 0.13, MeOH); CD (c 0.1(w/v)%, MeOH) 212  
221 (-19.30), 245 (-10.44), 283 (-4.58), 386 (2.67) nm, and the CD spectra showed the  
222 mirror-image cotton effects, further confirming that ( $\pm$ )-alsophilin were a pair of  
223 enantiomers (Extended Data Fig. 6). The above results indicated that the product with  
224 CD effects is not the optical monomer and is the enantiomer in the different ratio.  
225 Quantum chemical calculations of the electronic circular dichroism (ECD) spectra  
226 confirmed the absolute configurations of (-)-alsophilin and (+)-alsophilin as 7'S,8'S  
227 and 7'R,8'R, respectively by comparing experimental and predicted ECD curves  
228 (Extended Data Fig. 6).

## 229 **Biological activity assays of 11 metabolites**

230 These 11 metabolites were tested for their antioxidant efficacies, anti-inflammatory  
231 effects, and cytotoxicities. Antioxidant activities were evaluated by measuring lipid

232 peroxidation product malondialdehyde (MDA) as described<sup>26</sup>. The effect of the  
233 compounds on the production of MDA was calculated according to the OD at 532 nm.  
234 *In vitro* cytotoxicities (represented by IC<sub>50</sub> values) were evaluated against five tumor  
235 cell lines, including human cerebroma (U251), human hepatoma cells (HepG2),  
236 human gastric cancer cells (HGC27), human breast carcinoma cells (MCF7), and  
237 human colorectal carcinoma cells (HCT-116), using the MTT method based on the  
238 reported procedure<sup>27</sup>. Anti-inflammation activities were evaluated based on nitric  
239 oxide (NO) product inhibition in lipopolysaccharide (LPS)-stimulated RAW264.7  
240 cells as described<sup>28</sup>. NO production was determined by the Griess reaction and  
241 measured at 540 nm.

242 Significant antioxidant effects were detected for compounds (±)-alsophilin,  
243 (-)-alsophilin, (+)-alsophilin, piceatannol and cyperusphenol B, and their inhibitory  
244 rates on the lipid peroxidation product malondialdehyde (MDA) were all above 90%  
245 at 10<sup>-5</sup> M (Extended Data Fig. 9 and Supplementary Table 22). None of them showed  
246 any anti-inflammatory or cytotoxic activity.

247  
248

## 249 References

- 250 1 Li, H. et al. MicroRNA comparison between poplar and larch provides insight  
251 into the different mechanism of wood formation. *Plant Cell Rep.* **39**,  
252 1199-1217 (2020).
- 253 2 Langmead, B. & Salzberg, S. L. Fast gapped-read alignment with Bowtie 2.  
254 *Nat. Methods* **9**, 357-359 (2012).
- 255 3 Friedlnder, M. R., Mackowiak, S. D., Li, N., Chen, W. & Rajewsky, N.  
256 miRDeep2 accurately identifies known and hundreds of novel microRNA  
257 genes in seven animal clades. *Nucleic Acids Res.* **40**, 37-52 (2012).
- 258 4 Wen, M., Shen, Y., Shi, S. & Tang, T. miREvo: an integrative microRNA  
259 evolutionary analysis platform for next-generation sequencing experiments.  
260 *BMC Bioinformatics* **13** (2012).
- 261 5 Love, M. I., Huber, W. & Anders, S. Moderated estimation of fold change and  
262 dispersion for RNA-seq data with DESeq2. *Genome Biol.* **15**, 550 (2014).
- 263 6 Huerta-Cepas, J. et al. Fast genome-wide functional annotation through  
264 orthology assignment by eggNOG-mapper. *Mol. Biol. Evol.* **34**, 2115-2122  
265 (2017).
- 266 7 Chen, C., Chen, H., Zhang, Y., Thomas, H. R. & Xia, R. TBtools: an  
267 integrative toolkit developed for interactive analyses of big biological data.

- 268 *Mol. Plant* **13**, 1194-1202 (2020).
- 269 8 Maere, S. et al. Modeling gene and genome duplications in eukaryotes. *Proc.*  
270 *Natl. Acad. Sci. USA* **102**, 5454-5459 (2005).
- 271 9 Chen, W. et al. Genome-wide association analyses provide genetic and  
272 biochemical insights into natural variation in rice metabolism. *Nat. Genet.* **46**,  
273 714-721 (2014).
- 274 10 Thévenot, E., Roux, A., Xu, Y., Ezan, E. & Junot, C. Analysis of the human  
275 adult urinary metabolome variations with age, body mass index, and gender by  
276 implementing a comprehensive workflow for univariate and OPLS statistical  
277 analyses. *J. Proteome Res.* **14**, 3322-3335 (2015).
- 278 11 Gerlich, M. & Neumann, S. KEGG: Kyoto encyclopedia of genes and  
279 genomes. *Nucleic Acids Res.* **28**, 27-30 (2000).
- 280 12 Long, L., Liu, J., Gao, Y., Xu, F. C. & Gao, W. Flavonoid accumulation in  
281 spontaneous cotton mutant results in red coloration and enhanced disease  
282 resistance. *Plant Physiol. Biochem.* **143**, 40-49 (2019).
- 283 13 Chuang, C-H., Chan, S-T., Chen, C-H. & Yeh, S-L. Quercetin enhances the  
284 antitumor activity of trichostatin A through up-regulation of p300 protein  
285 expression in p53 null cancer cells. *Chem. Biol. Interact.* **306**, 54-61 (2019).
- 286 14 Mokdad-Bzeouich, I. et al. Investigation of immunomodulatory and  
287 anti-inflammatory effects of eriodictyol through its cellular anti-oxidant  
288 activity. *Cell Stress Chaperones* **21**, 773-81 (2016).
- 289 15 Warnke, I. & Furche, F. Circular dichroism: electronic. *Wiley Interdisciplinary*  
290 *Reviews Computational Molecular Science* **2**, 150-166 (2012).
- 291 16 Liu, C. et al. Chemical Constituents from *Inonotus obliquus* and their  
292 biological activities. *J. Nat. Prod.* **77**, 35-41 (2014).
- 293 17 Seulah, L. et al. Anti-Inflammatory phenolic metabolites from the edible  
294 fungus *Phellinus baumii* in LPS-Stimulated RAW264.7 cells. *Molecules* **22**,  
295 1583 (2017).
- 296 18 Kiselev, K. V., Grigorochuk, V. P., Ogneva, Z. V., Suprun, A. R. & Dubrovina,  
297 A. S. Stilbene biosynthesis in the needles of spruce *Picea jezoensis*.  
298 *Phytochemistry* **131**, 57-67 (2016).
- 299 19 Ito, T. et al. Occurrence of stilbene oligomers in *Cyperus* rhizomes.  
300 *Fitoterapia* **83**, 1420-9 (2012).
- 301 20 Idowu, T. O. et al. Doubly linked, A-type proanthocyanidin trimer and other  
302 constituents of *Ixora coccinea* leaves and their antioxidant and antibacterial  
303 properties. *Phytochemistry* **71**, 2092-8 (2010).
- 304 21 Lee, I-K. & Yun, B-S. Hispidin analogs from the mushroom *Inonotus*  
305 *xeranticus* and their free radical scavenging activity. *Bioorg. Med. Chem. Lett.*  
306 **16**, 2376-9 (2006).
- 307 22 Pizzolatti, M. G., Brighente, I. M. C., Bortoluzzi, A. J. O., Schripsema, J. &  
308 Verdi, L. G. Cyathenosin A, a spiropyranosyl derivative of protocatechuic acid  
309 from *Cyathea phalerata*. *Phytochemistry* **68**, 1327-30 (2007).
- 310 23 Lu, R-M., Min, C., Liao, P-Y & Wei, J-H. Chemical constituents in stem of  
311 Zhuang Medicine *Alsophila spinulosa*. *Chin. Tradit. Herbal Drugs* **44**,

312 2195-99 (2013).  
313 24 Jung., J-Y. et al. Antioxidant polyphenols from the mycelial culture of the  
314 medicinal fungi *Inonotus xeranticus* and *Phellinus linteus*. *J. Appl. Microbiol.*  
315 **104**, 1824-32 (2008).  
316 25 Ito, T. et al. Occurrence of stilbene oligomers in *Cyperus* rhizomes.  
317 *Fitoterapia* **83**, 1420-142 (2012).  
318 26 Hu, Y. et al. Targeted isolation and structure elucidation of stilbene glycosides  
319 from the bark of *Lysidice brevicalyx* Wei guided by biological and chemical  
320 screening. *J. Nat. Prod.* **71**, 1800-1805 (2008).  
321 27 Xin et al. Chrysoxanthones A-C, three new xanthone-chromanone heterodimers  
322 from sponge-associated penicillium chrysogenum HLS111 treated with  
323 histone deacetylase inhibitor. *Mar. Drugs* **16**, 357 (2018).  
324 28 Zhu et al. Hypocreaterpenes A and B, cadinane-type sesquiterpenes from a  
325 marine-derived fungus, *Hypocreales* sp. *Phytochem. Lett.* **6**, 392-396 (2013).  
326

## Supplementary Figures

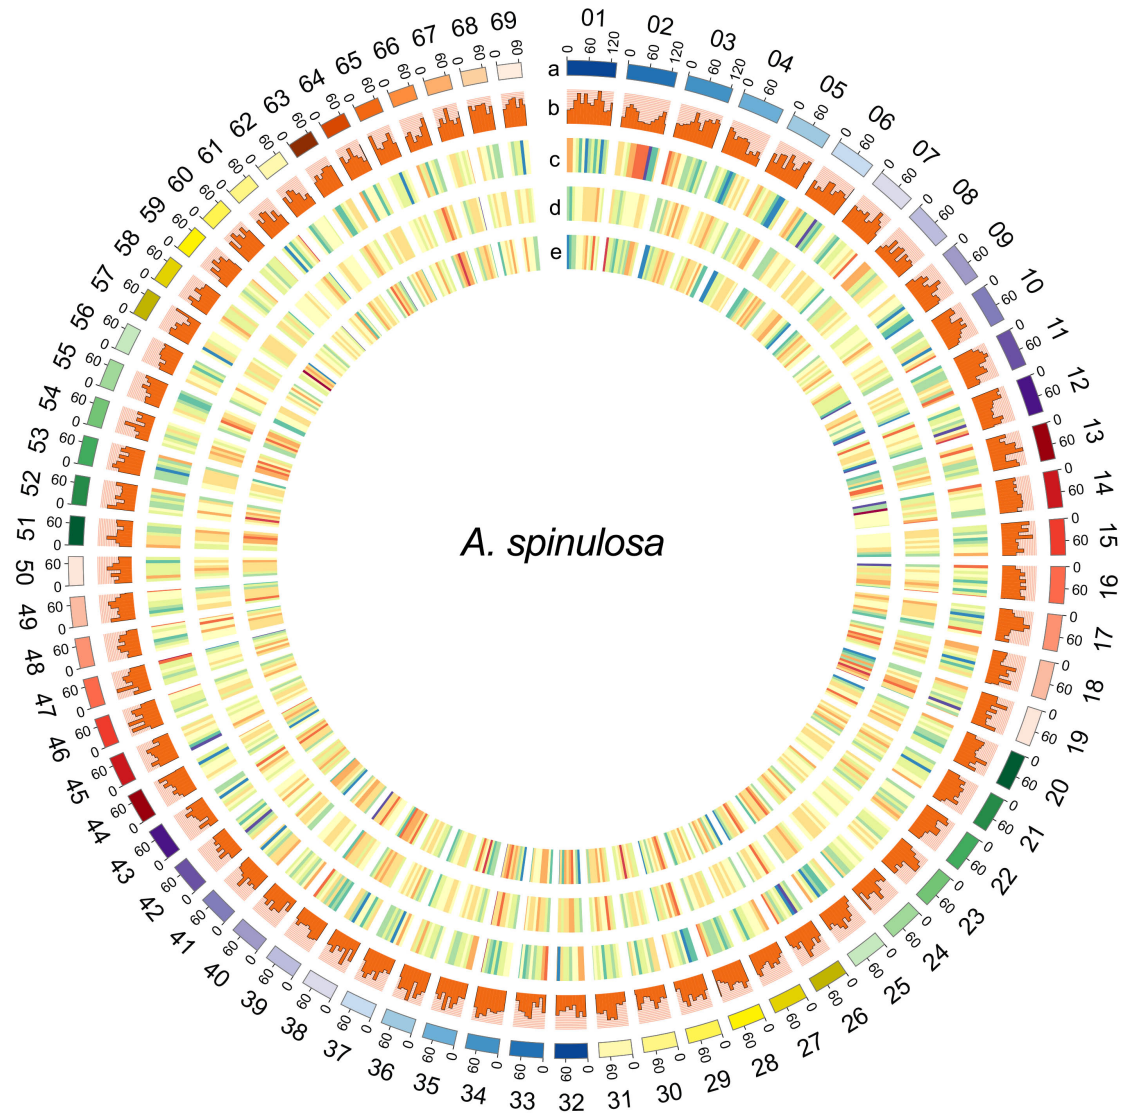

**Supplementary Figure 1. Characteristics of *A. spinulosa* genome.** a, Chromosome karyotype. b, Gene density. c, DNA transposon. d, Retrotransposon. e, GC content.

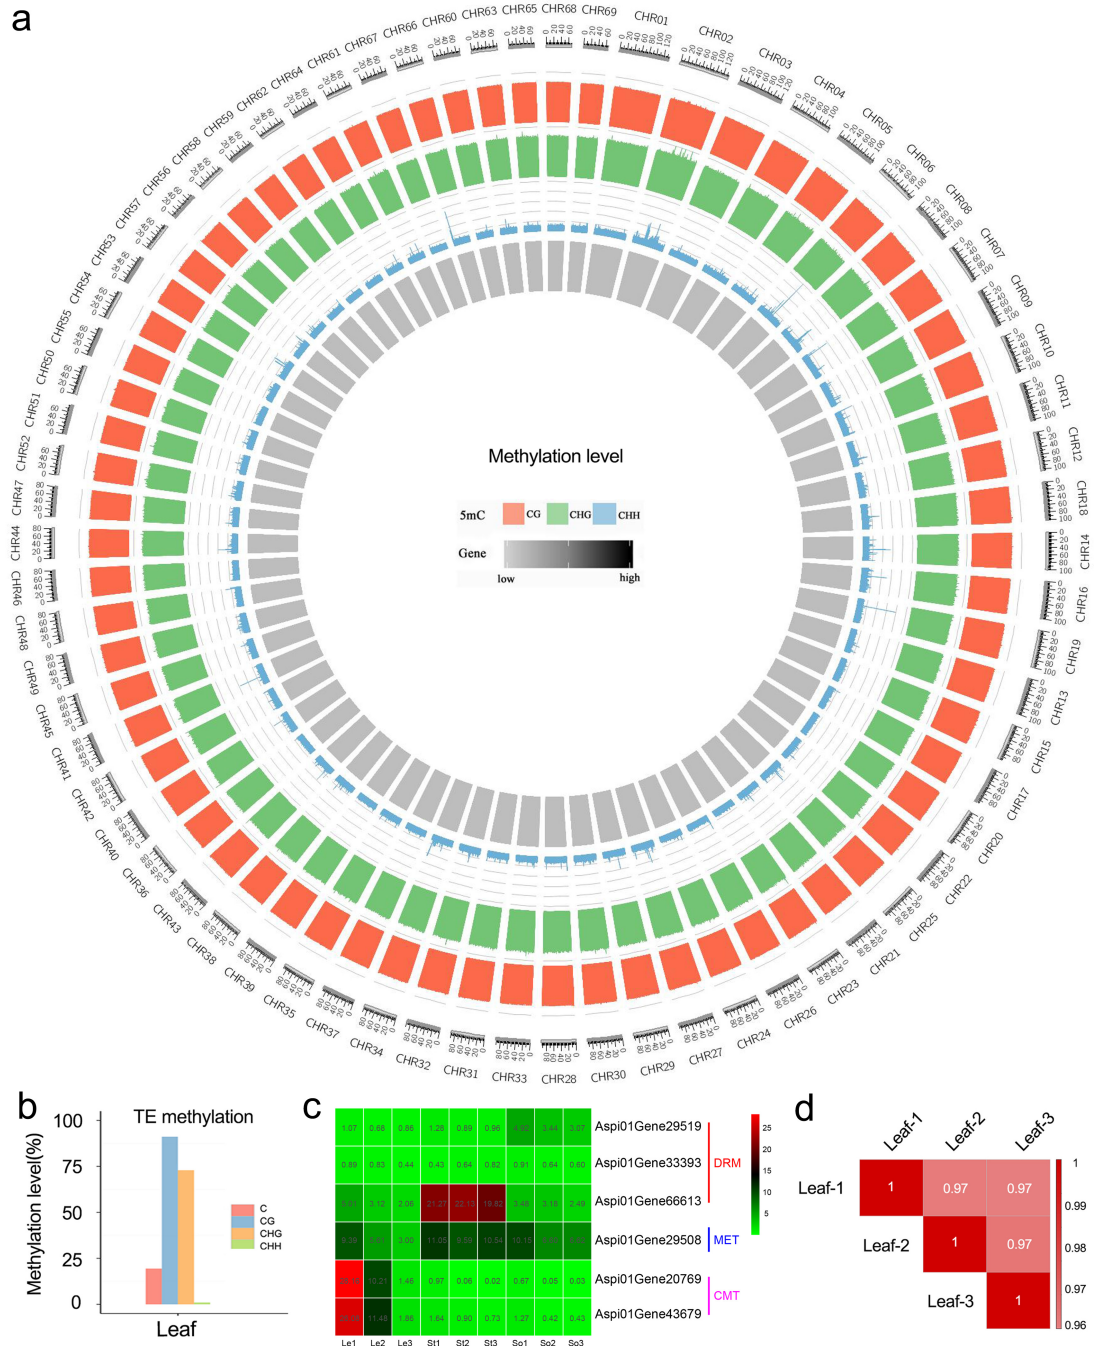

**Supplementary Figure 2. Methylation analysis in *A. spinulosa* leaves.** **a**, Circos plot of methylation level in the of context CG, CHG and CHH in 69 chromosomes. The layers from outer circle to inner circle represent chromosomes, mCG methylation level, mCHG level, mCHH level, and gene density, respectively. **b**, Bar plot of TE methylation levels of contexts C, CG, CHG and CHH. **c**, Heat map of FPKM values of 6 DNA methyltransferase genes in stems, leaves, and sori. St1/2/3: stem stage 1/2/3, Le1/2/3: leaf stage 1/2/3, So1/2/3: sorus stage 1/2/3. **d**, Pearson correlation of methylation level in the whole genome among three leaf samples. The high correlation coefficient ( $R^2 > 0.97$ ) shows a good repeatability.

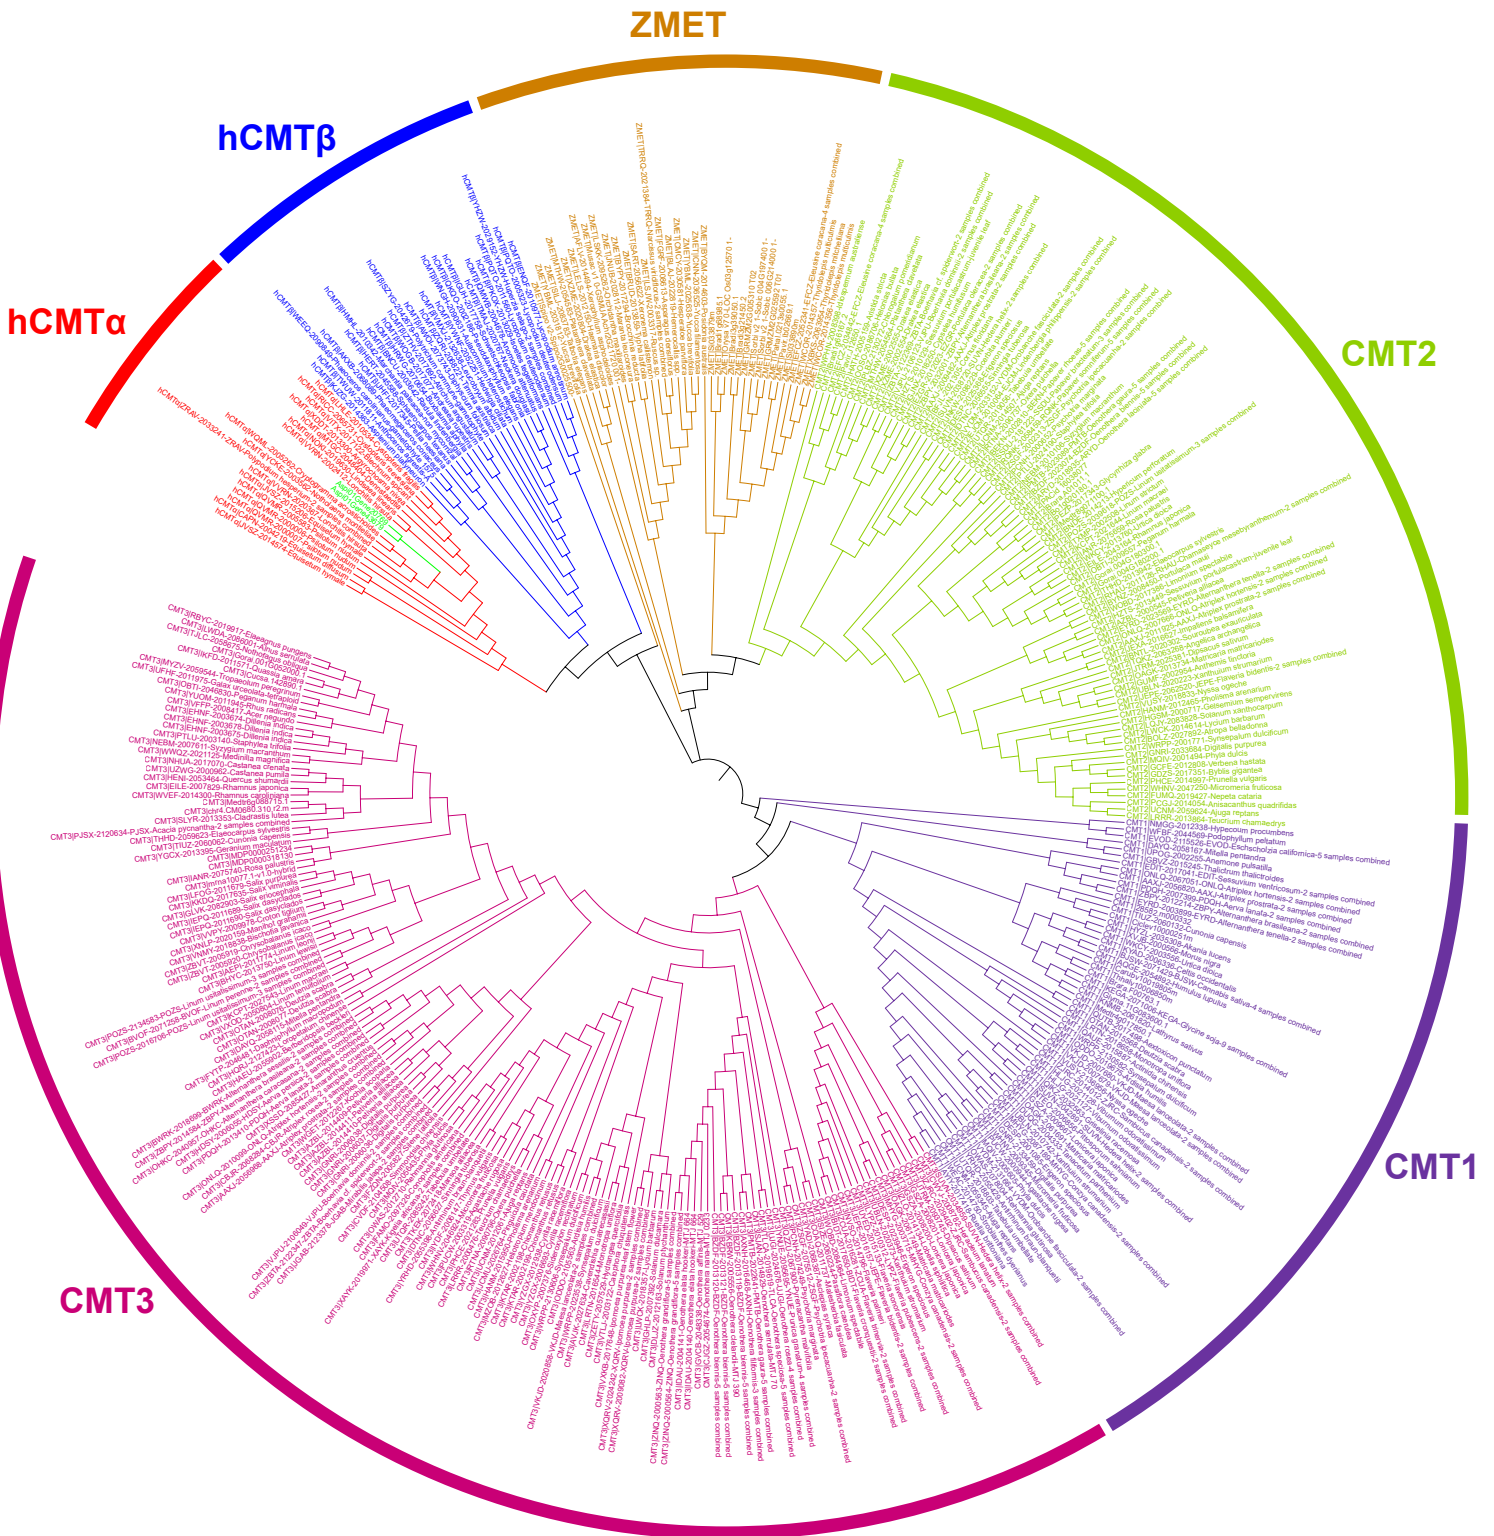

**Supplementary Figure 3. Phylogenetic tree of CMT proteins from different species.** These proteins are clustered into six groups (hCMT $\alpha$ , hCMT $\beta$ , ZMET, CMT1, CMT2, and CMT3). Two CMT proteins in *A. spinulosa*, highlighted in green, are in the hCMT $\alpha$  clade. The protein sequences were aligned by MUSCLE and the phylogenetic tree was constructed by RAxML using a maximum likelihood method.

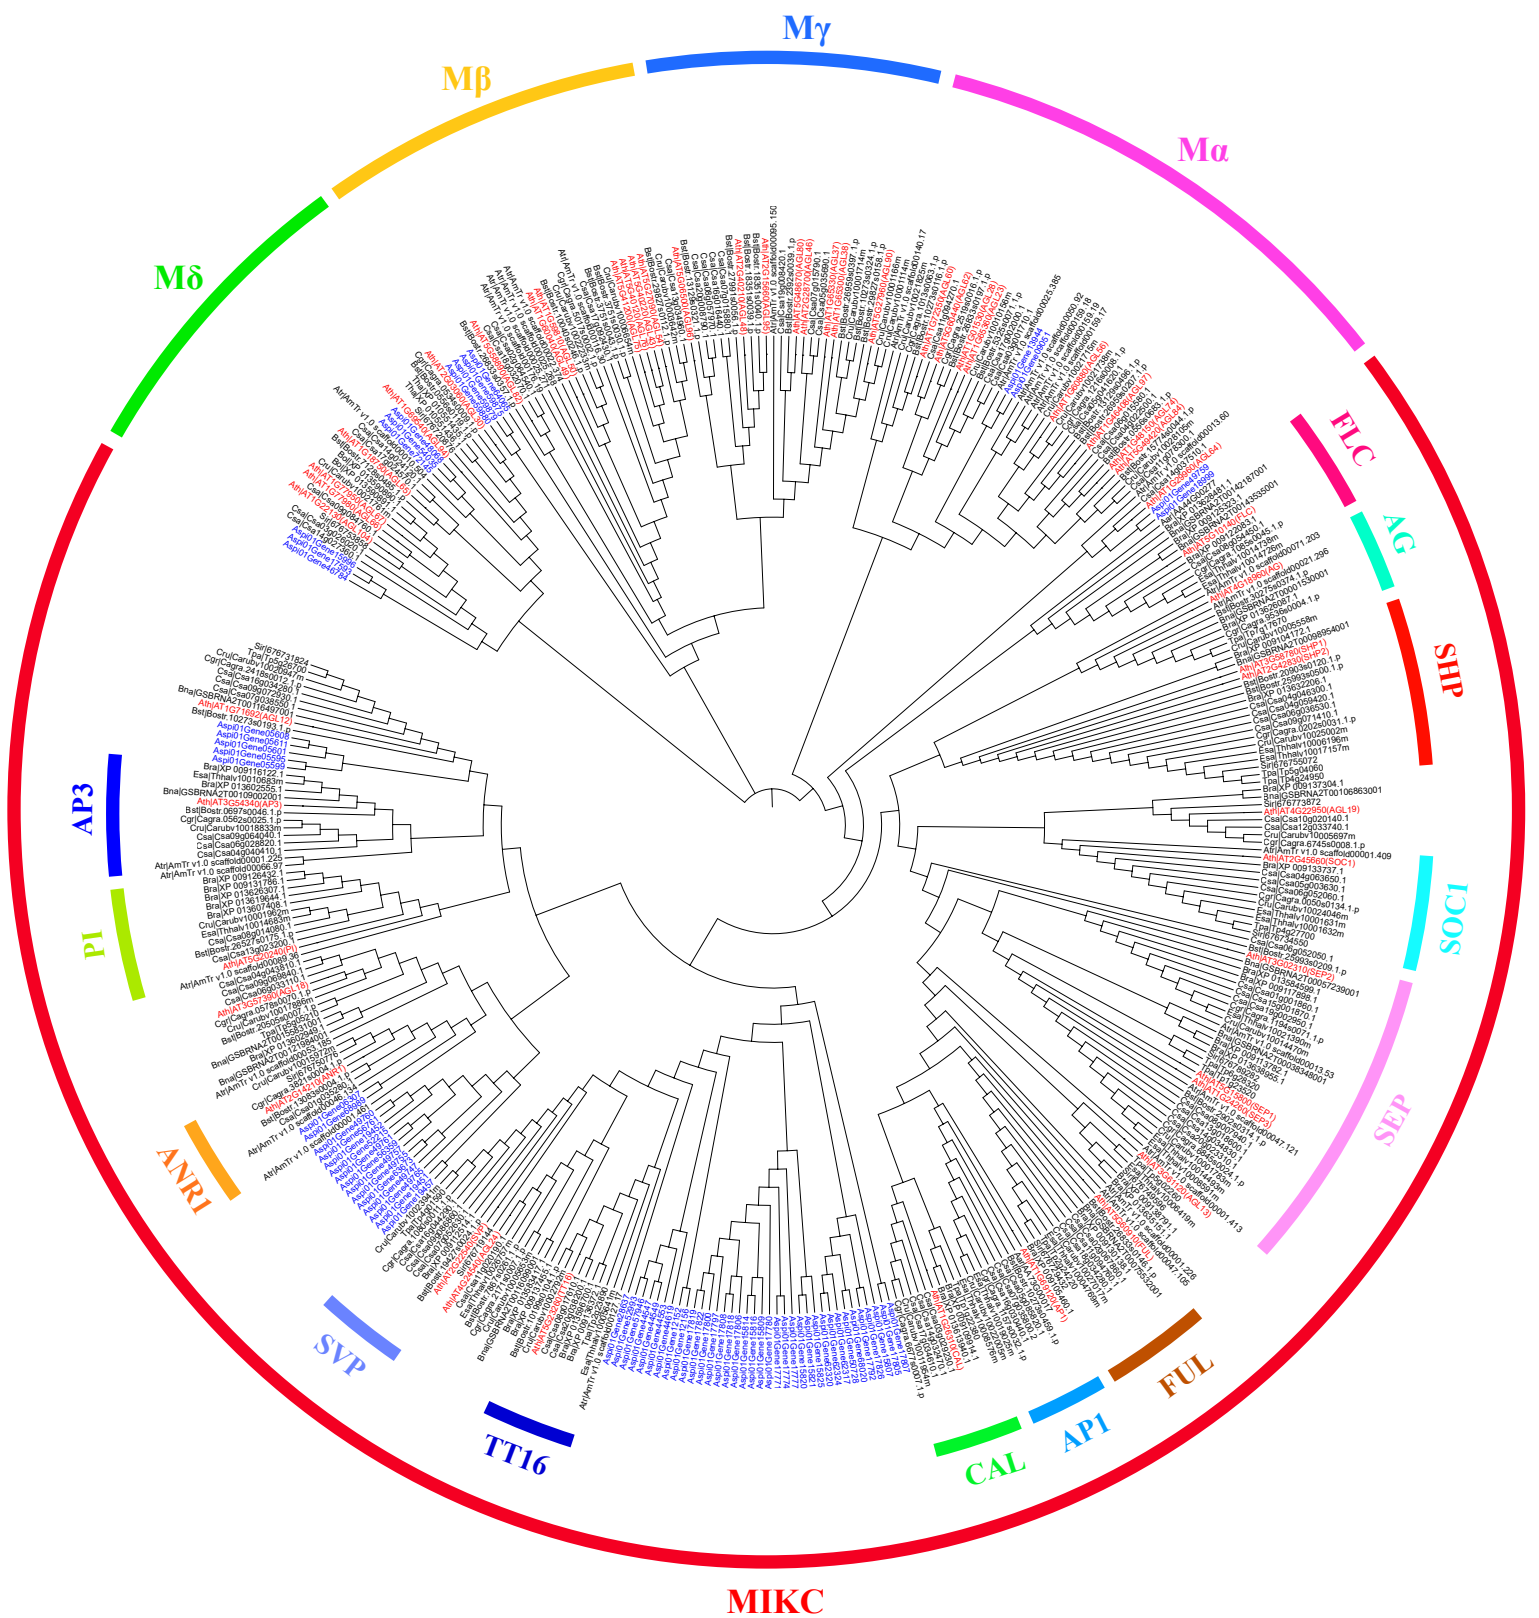

**Supplementary Figure 4. Phylogenetic analysis of MADS-box proteins in *A. spinulosa* and other plants.** Species name abbreviations are listed before protein names, Ath, *Arabidopsis thaliana*; Atr, *Amborella trichopoda*; Aar, *Aethionema arabicum*; Bst, *Boechera stricta*; Bna, *Brassica napus*; Bra, *Brassica rapa*; Bol, *Brassica oleracea*; Csa, *Camelina sativa*; Cgr, *Capsella grandiflora*; Cru, *Capsella rubella*; Esa, *Eutrema salsugineum*; Sir, *Sisymbrium irio*; Tpa, *Thellungiella parvula*; Tha, *Tarenaya hassleriana*. Proteins are clustered into five categories, including MIKC, M $\alpha$ , M $\beta$ , M $\gamma$ , M $\delta$ . The Arabidopsis and *A. spinulosa* proteins are highlighted in red and blue, respectively. Protein sequences were aligned by MUSCLE and the phylogenetic tree was constructed by RAXML using a maximum likelihood method.



**a**

```

CreNOP10      MYLMYDDDDAGNRVYTLKKIAPDGTPTKSAHPARFSPDDKFSRERITCKKRFGLLPIQKPPPEL
SmNOP10-1    MYLMCYVNEEGQKVYTIKKEAPDGSPTSSHPARFSPDDKFSKQRVMLKKRFGLLPTQKPPHEY
SmNOP10-2    MYLMCYVNEEGQKVYTIKKEAPDGSPTSSHPARFSPDDKFSKQRVMLKKRFGLLPTQKPPHEY
StNOP10      MFLMCYINEEGQKVYTLKKELDDGPTSSHPARFSPDDKCSKHRVILKKRFGLLPTQKPPQEY
MpNOP10      MYLMYINENGSKVYTMKKEAPDGSPTMSAHPARFSPDDKFSKQRIICKRRFGLLPTQGPAPHNY
AtNOP10      MYLQCYINEKGEKVYTTKKESPLGLATESAHPARFSPDDKYSKQRVLLKKRFGLLPTQNAPLQZ
PtNOP10-1    MYLQFYINDNGDKVYTTKKESPLGLPTQSAHPARFSPDDKFSRQRVLLKKRFGLLPTQQSPLKZ
PtNOP10-2    MYLQFYINDNGDKVYTTKKESPLGLPTESAHPARFSPDDKYSRQRFLLKKRFGLLPTQQSPLKY
PpNOP10      MYLMCYTNENGDKVYTLKKEPVG EATHSAHPARFSPDDKFSKHRVILKKRFGLLPTQPPHNY
ScNOP10-1    MYLMCYTNENGDKVYTLQKESPEGGPTQSAHPARFSPDDKFSKHRVLLKKRFGLLPTQSPPPAY
ScNOP10-2    MYLMCYTNENGDK-----KESPEGGPTQSAHPARFSPDDKFSKHRVLLKKRFGLLPTQSPPPAY
AcNOP10      MYLMFYINENGDKVYTLQKDSPEGTPTQSAHPARFSPDDKFSKHRVLLKKRFGLLPTQSPPTY
CriNOP10-1   MYLMFYINENGDKVYTLQKDSPEGSPTQSAHPARFSPDDKFSKHRVLLKKRFGLLPTQKPPSY
CriNOP10-2   MYLMFYINENGDKVYTLQKDSPEGSPTQSAHPARFSPDDKFSKHRVLLKKRFGLLPTQKPPPTY
CriNOP10-3   MYLMFYINENGDKVYTLQKDSPEGSPTQSAHPARFSPDDKFSKHRVLLKKRFGLLPTQKPPPTY
GmNOP10      MYLMFYINDKGEKVYTLKKESPLGPTQSAHPARFSPDDKFSRHRILLKKRFGLLPTQQPAPRY
AaNOP10      MYLMFYINDNGEKVYTLKKEDPAGTSPQSAHPARFSPDDKFSKQRITLKKRFGLLPTQAPPKEY

```

**b**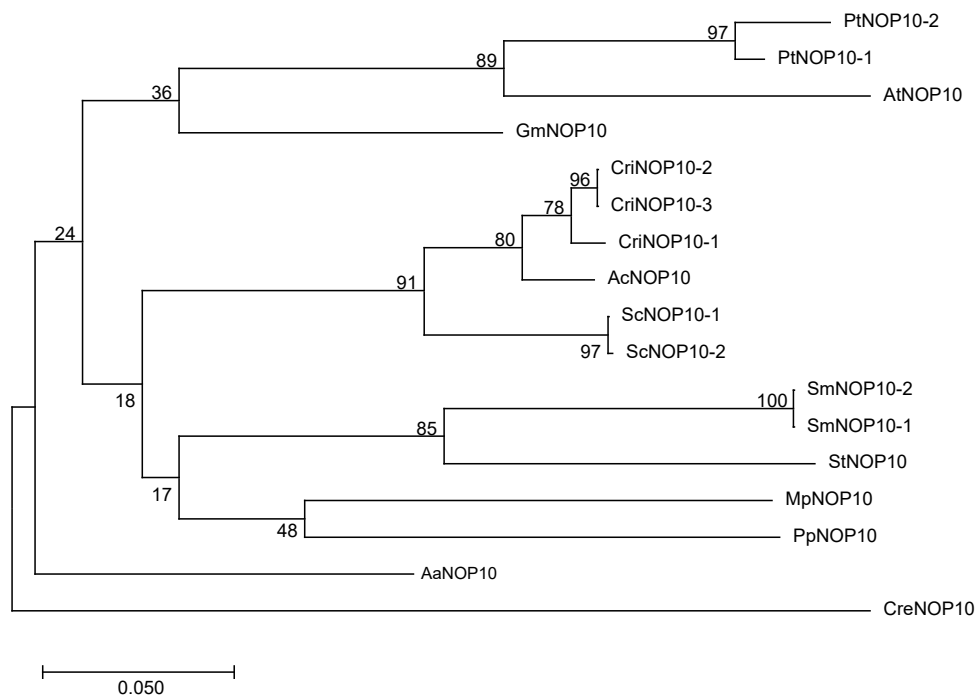

**Supplementary Figure 5. Sequence alignment and phylogenetic analysis of NOP10 proteins in 12 plant species.** **a**, protein sequences were aligned by MUSCLE. Cre: *Chlamydomonas reinhardtii*; Sm: *Selaginella moellendorffii*; St: *Selaginella tamariscina*; Pp: *Physcomitrella patens*; Sc: *Salvinia cucullata*; At: *Arabidopsis thaliana*; Pt: *Populus trichocarpa*; Mp: *Marchantia polymorpha*; Ac: *Adiantum capillus-veneris*; Cri: *Ceratopteris richardii*; Gm: *Gnetum montanum*; Aa: *Anthoceros angustus*. **b**, A neighbor joining (NJ) phylogenetic tree was constructed using Mega-X with 1000 bootstrap replicates.

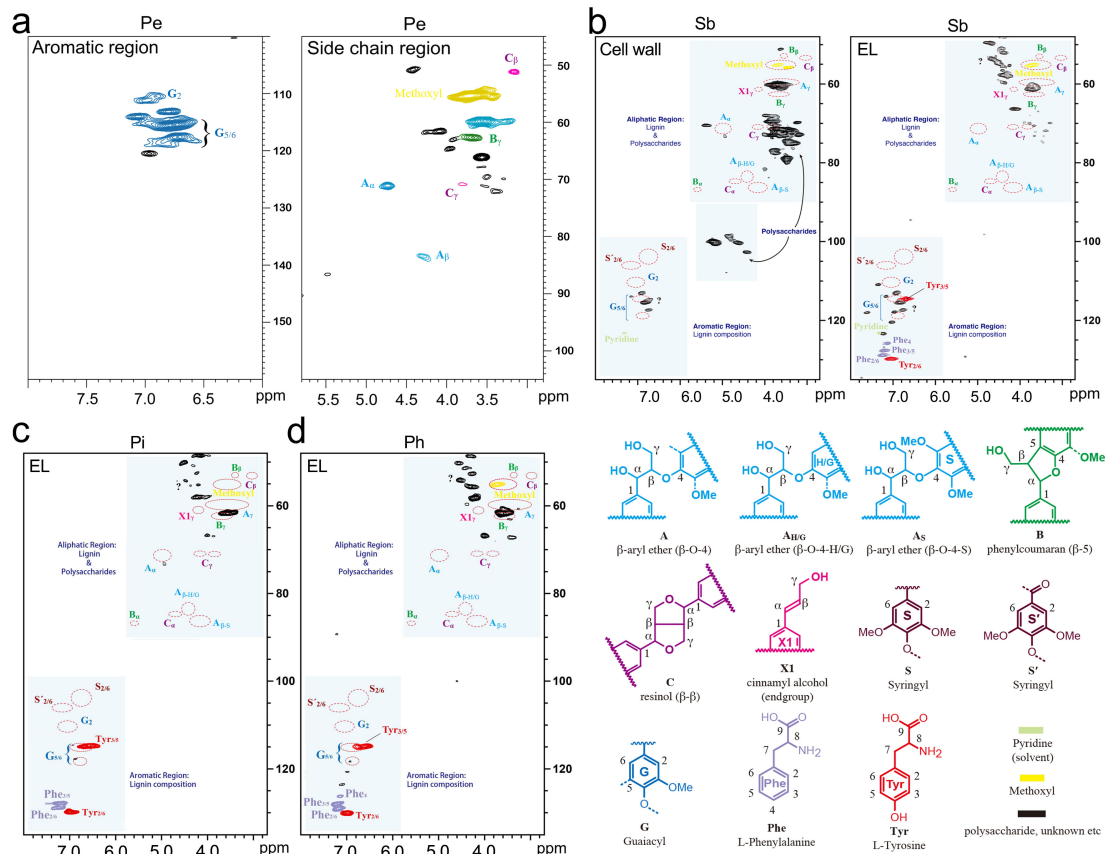

**Supplementary Figure 6. Lignin structures analysis in petiole (Pe), sclerenchymatic belt (Sb), pith (Pi) and phloem (Ph) of *A. spinulosa* analyzed by 2D HSQC NMR. a**, NMR analysis of petiole. G-type monolignol in aromatic region and some chemical bonds such as  $\beta$ -O-4,  $\beta$ - $\beta$  in side chain region were detected. **b**, NMR analysis of sclerenchymatic belt. No lignin components were found in the whole cell wall gel-sample. All possible lignin components are marked with red dot lines, and the chemical structures of the lignin subunits are color-coded to show their possible signal assignments in the spectra. None of the correlations from the sample match with the lignin components except methoxyl group. All lignin region of 2D HSQC NMR spectra of enzyme lignin (EL) from sclerenchymatic belt. No lignin components are shown from the enzyme lignin sample. The polysaccharides disappear after the cellulose treatment. **c**, NMR analysis of pith. No lignin components are shown from the EL sample. **d**, NMR analysis of phloem. No lignin components are shown from the EL sample.

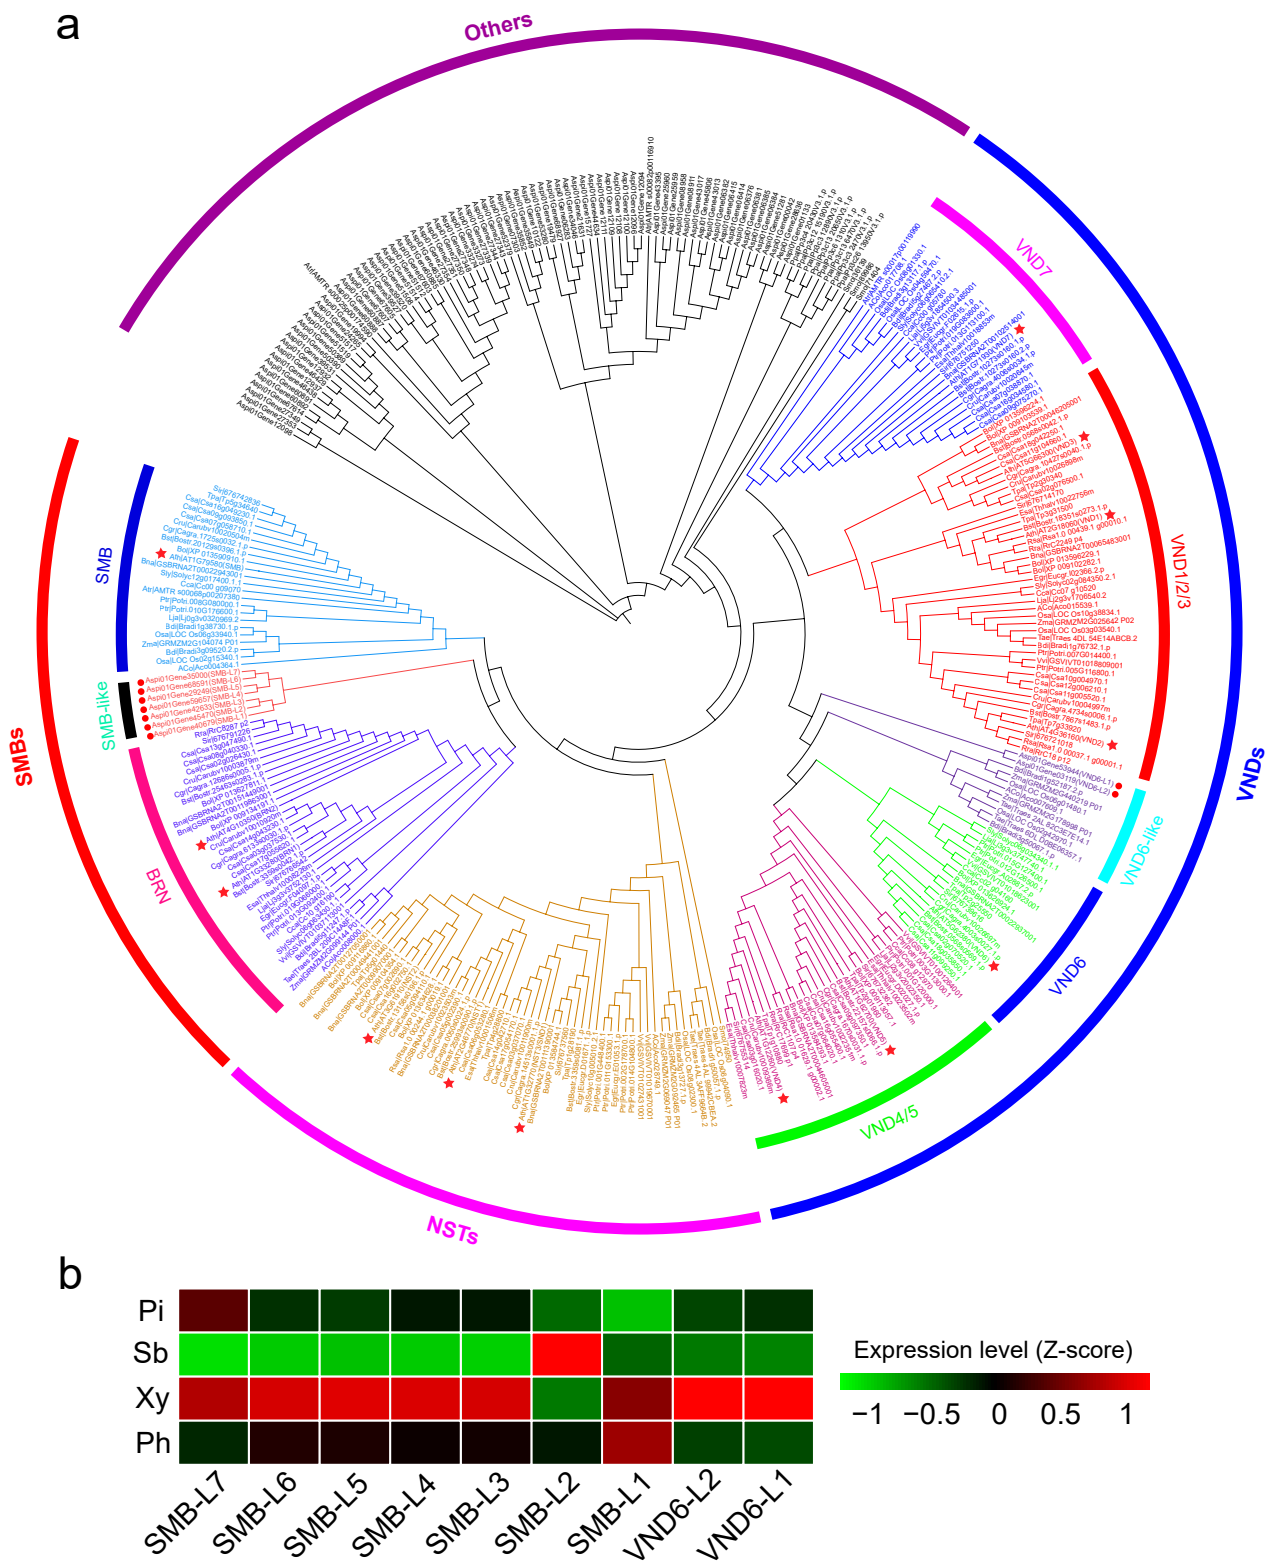

**Supplementary Figure 7. Phylogenetic analysis of NAC proteins in *A. spinulosa* and other plants.** **a**, NAC protein sequences are from *Arabidopsis thaliana* (Ath), *Amborella trichopoda* (Atr), *Ananas comosus* (Ao), *Oryza sativa* (Osa), *Populus trichocarpa* (Ptr), *Vitis vinifera* (Vvi), *Zea mays* (Zma), *Triticum aestivum* (Tae), *Eucalyptus grandis* (Egr), *Coffea canephora* (Cca), *Solanum lycopersicum* (Sly), *Lotus japonicas* (Lja), *Brachypodium distachyon* (Bdi), *Physcomitrium patens* (Ppa), *Selaginella moellendorffii* (Smo), *Boechera stricta* (Bst), *Brassica napus* (Bna), *Brassica oleracea* (Bol), *Camelina sativa* (Csa), *Capsella grandiflora* (Cgr), *Capsella rubella* (Cru), *Eutrema salsugineum* (Esa), *Raphanus raphanistrum* (Rra), *Raphanus sativus* (Rsa), *Sisymbrium irio* (Sir), and *Thellungiella parvula* (Tpa). Protein sequences were aligned by MUSCLE and the phylogenetic tree was constructed using RAxML using a maximum likelihood method. According to the phylogenetic relationship, all proteins are clustered into four categories, including VNDs, SMBs, NSTs, and Others. Two *A. spinulosa* genes, marked with red circles, were clustered in the VND clade. Seven *A. spinulosa* genes, marked with red stars, were clustered in the SMB clade. **b**, Heat map shows the relative expression levels of seven SMB-like and two VND6-like genes in pith (Pi), sclerenchymatic belt (Sb), xylem (Xy), and phloem (Ph) of *A. spinulosa*. FPKM values were normalized using the Z-score method.

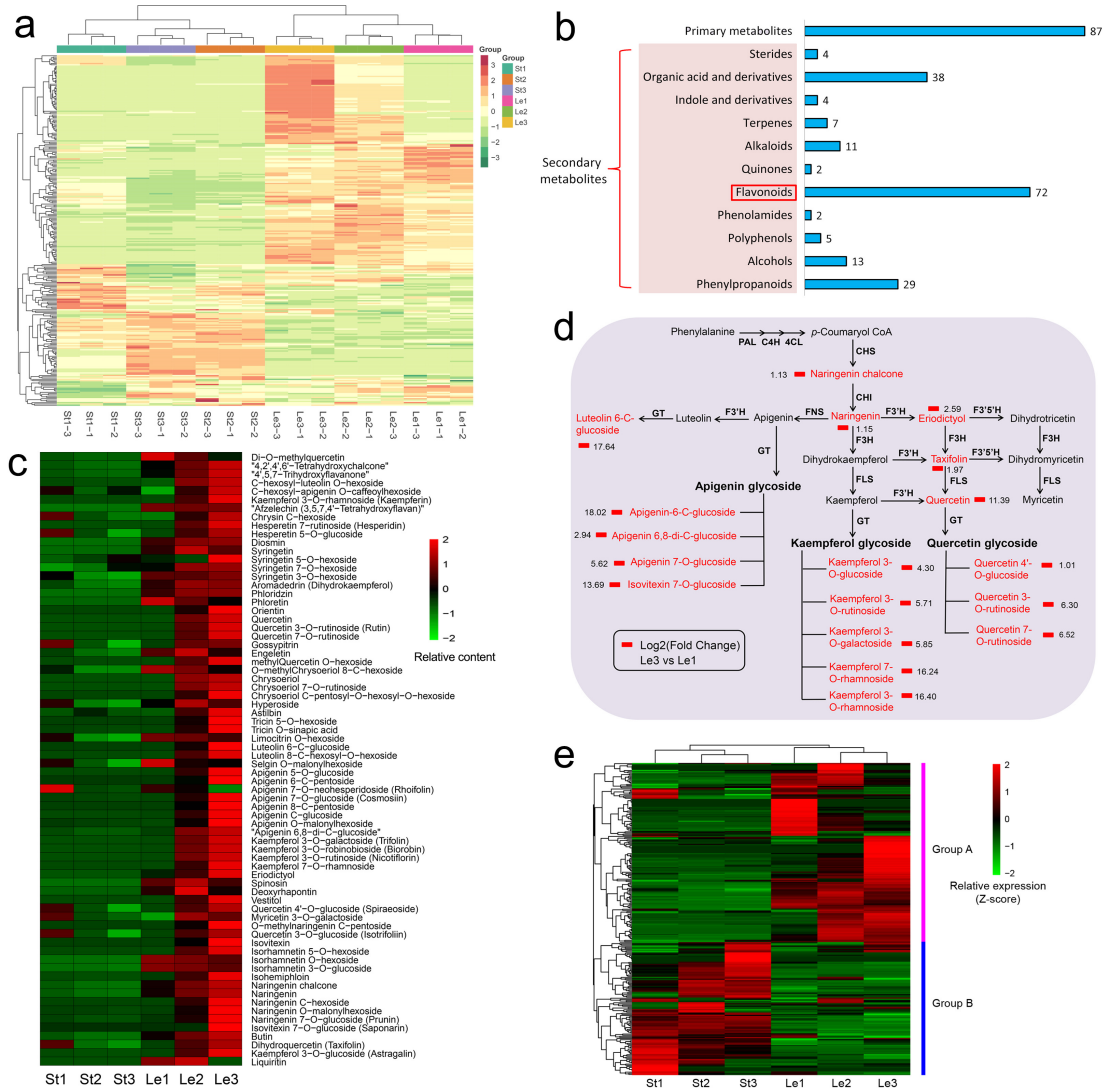

**Supplementary Figure 8. Characterizations of secondary metabolites in leaves and stems of *A. spinulosa*.** **a**, Abundances of 274 metabolites detected by widely targeted metabolomics. Relative abundances are normalized and used in hierarchical cluster analysis using R. 18 samples are clustered to 6 groups and each group contains three biological replicates. St1/2/3 (stem stage 1/2/3), Le1/2/3 (leaf stage 1/2/3). **b**, Histogram shows the category of 274 metabolites, including 87 primary and 187 secondary metabolites. The flavonoids constitute the majority (38.5% of the secondary metabolites). **c**, Heat map shows the relative contents of 72 flavonoid metabolites detected in stems and leaves of *A. spinulosa* by the technology of widely targeted metabolomics. The counts are normalized using Z-score method. **d**, Flavonoid biosynthesis pathway in leaves. Small red cells represent log<sub>2</sub> (fold change) of metabolites between Le3 and Le1. PAL: phenylalanine ammonia-lyase; C4H: cinnamate-4-hydroxylase; 4CL: 4-coumarate CoA ligase; CHS: chalcone synthase; CHI: chalcone isomerase; F3H: flavanone 3-hydroxylase; F3'H: flavonoid 3'-hydroxylase; F3'5'H: flavonoid 3', 5'-hydroxylase; FLS: flavonol synthase; FNS:

flavone synthase; GT: glycosyltransferase. **e**, Heat map shows relative expression of genes related to flavonoid biosynthetic pathway in stems and leaves of *A. spinulosa*. FPKM values were normalized using Z-score method. 358 pathway enzyme genes identified in the *A. spinulosa* genome, including 8 *CHS* genes, 4 *CHI* genes, 10 *F3H* genes, 10 *FLS* genes, 21 *F3'H* genes, 6 *F3'5'H* genes, 46 *FNS* genes, and 253 *GT* genes, are clustered into two groups (A and B) according to the expression patterns. The genes in group A and B are highly expressed in leaves and stems, respectively.



**Supplementary Figure 9. The spectra of (±)-alsophilin for its structure determination.** **a**, HRESIMS spectrum of (±)-alsophilin, measured on a Thermo Scientific Q Exactive Focus Orbitrap mass spectrometer. **b**, Ultraviolet (UV) spectrum of (±)-alsophilin, measured on a JASCO J-815 CD spectropolarimeters. UV (MeOH)  $\lambda_{\text{max}}$  (log  $\epsilon$ ) 203.5 (2.28), 259.5 (0.35), and 385.5 (0.59) nm. **c**, Infrared (IR) spectrum of (±)-alsophilin, acquired by KBr disk method on a Shimadzu FTIR-8400S spectrometer. IR (KBr)  $\nu_{\text{max}}$  3324, 1671, 1607, 1544, 1447, 1286, 1162, 1115, 1007, 965, 848, 814, 762, 689  $\text{cm}^{-1}$ . **d**,  $^1\text{H}$  NMR (nuclear magnetic resonance) spectrum (500 MHz) of (±)-alsophilin, recorded on a Bruker AV-500 spectrometer using deuterated solvent  $\text{CD}_3\text{OD}$  with TMS as an internal standard, and  $^1\text{H}$  NMR spectral data are shown in Supplementary Table 21. **e**,  $^{13}\text{C}$  NMR spectrum (125 MHz) of (±)-alsophilin, recorded on a Bruker AV-500 spectrometer using deuterated solvent  $\text{CD}_3\text{OD}$  with TMS as an internal standard, and  $^{13}\text{C}$  NMR spectral data were shown in Supplementary Table 21. **f**,  $^1\text{H}$ - $^{13}\text{C}$  correlation spectra of (±)-alsophilin, with 1D  $^1\text{H}$  and  $^{13}\text{C}$  spectra on the horizontal and vertical axes; acquired on a Bruker AV-500, 500 MHz spectrometer, in  $\text{CD}_3\text{OD}$  (central solvent peaks used as references. HSQC correlations are overlaid on the HMBC spectra; magenta contours are for the 1-bond  $^1\text{H}$ - $^{13}\text{C}$  correlations of protonated carbons for the hispidin (H) moiety, green contours for the piceatannol (P) moiety. HMBC spectra (black) showing 2- and 3-bond correlations that aided the assignments. The correlations (highlighted in green) from protons P7' and P8' are particularly useful, those correlating with carbons H12 and H11 (magenta highlighting and circled) being especially diagnostic for establishing the phenylcoumaran nature of the product derived from P8'-H12 radical coupling. Boxes labeled  $\times 2.5$  are lower-level contours (expanded  $2.5\times$ ) useful for assignments. Contours colored light gray are from residual 1-bond correlations (split by the 1-bond  $^1\text{H}$ - $^{13}\text{C}$  coupling constant) that are not minimized in the used HMBC experiment. Assignments for the 1D proton and carbon spectral projections are numbered and color-coded to match the (±)-alsophilin. **g**, ROESY spectrum of (±)-alsophilin, recorded on a Bruker AV-500 spectrometer using deuterated solvent  $\text{CD}_3\text{OD}$  with TMS as an internal standard. Important cross-peaks are highlighted by being dark blue (positive) and red (negative); their lighter colors are from the diagonal and less-important attributes of the spectrum. Assignments for the 1D proton and carbon spectral projections are numbered and color-coded to match the (±)-alsophilin. Note that the proton spectrum used for the projections is not run on the same sample nor at the same time; some peaks have therefore been moved. We use the dotted lines to show the offset. **h**, Key HMBC and ROESY correlations of (±)-alsophilin. The relative configuration of (±)-alsophilin is determined to be *trans* orientation between protons P7' and P8' from the key ROESY correlations between protons P7'/P10'(P14') and P8'/P2'.

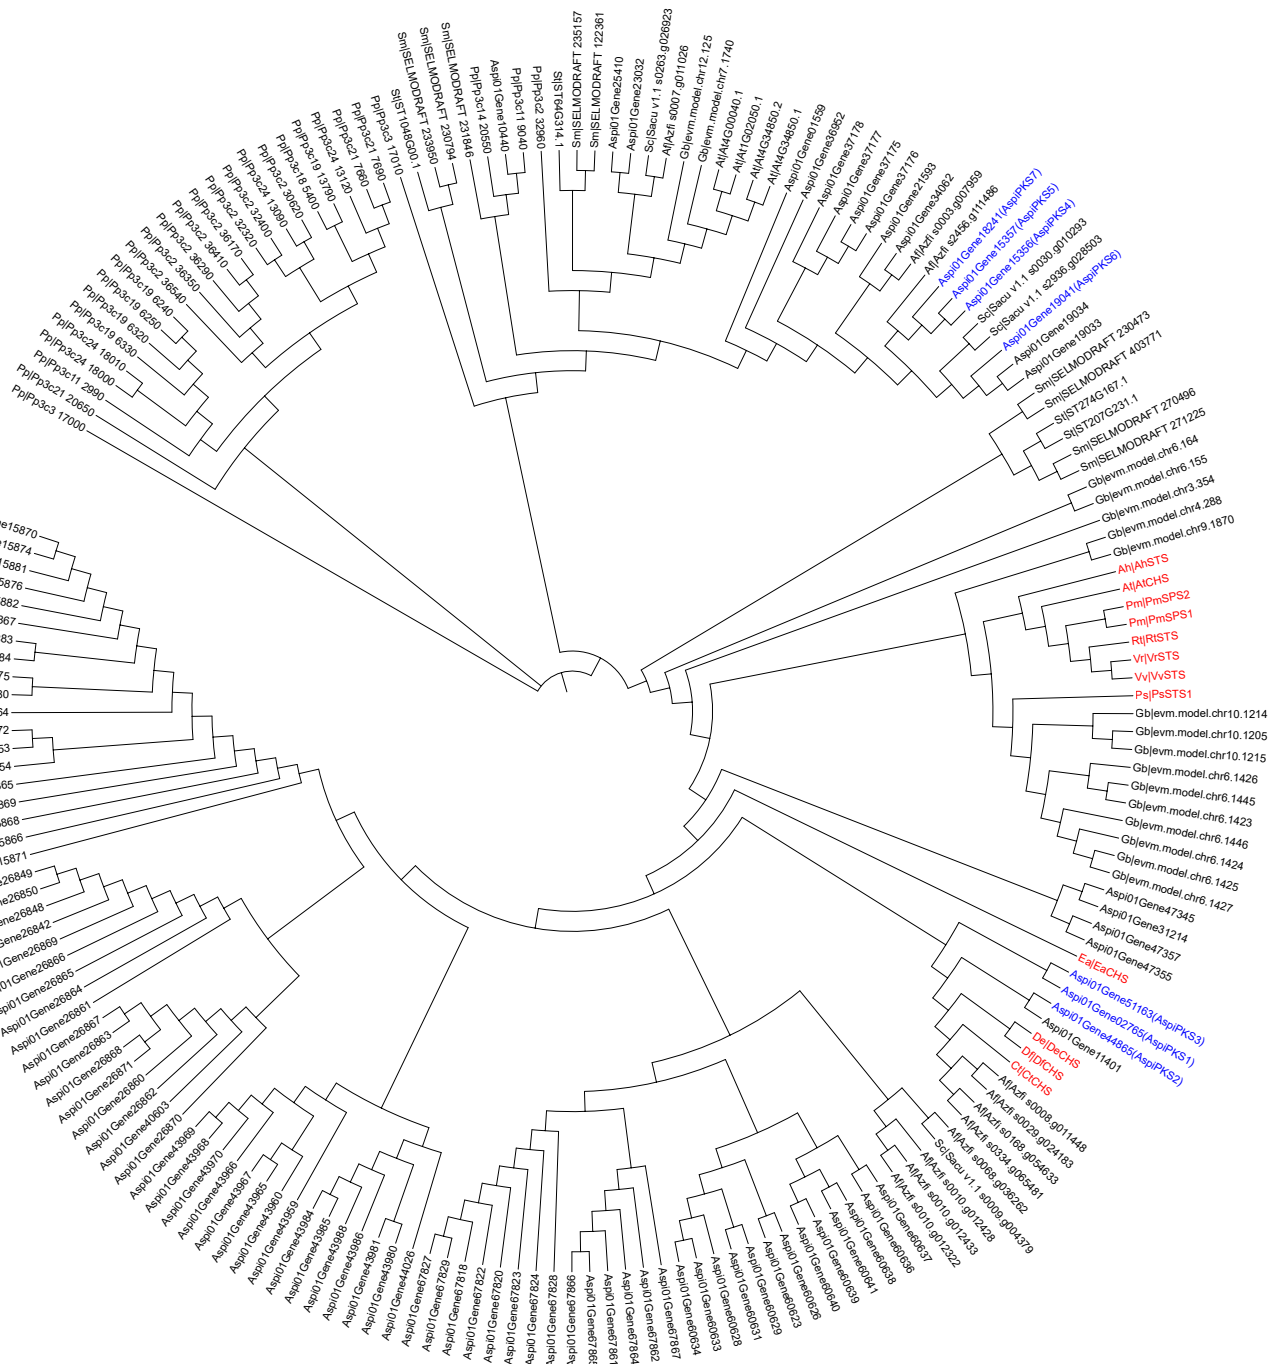

**Supplementary Figure 10. Phylogenetic relationships of PKS III proteins in different species.** The abbreviations before protein names represent different species, At: *Arabidopsis thaliana*, Gb: *Ginkgo biloba*, Sm: *Selaginella moellendorffii*, St: *Selaginella tamariscina*, Af: *Azolla filiculoides*, Sc: *Salvinia cucullata*, Pp: *Physcomitrella patens*, Pm: *Piper methysticum*, Ct: *Ceratopteris thalictroides*, De: *Dryopteris erythrosora*, Df: *Dryopteris fragrans*, Ea: *Equisetum arvense*, Ps: *Pinus sylvestris*, Ah: *Arachis hypogaea*, Vr: *Vitis riparia*, Vv: *Vitis vinifera*, Rt: *Rheum tataricum*. The red genes represent reported function-known proteins, with GenBank accession numbers: CtCHS (AFN02448), DeCHS (AHU87077), DfCHS (AHA85054), EaCHS (BAA89501), AtCHS (BAD89858), AhSTS (BAA78617), RtSTS (AAP13782), VrSTS (AAF00586), VvSTS (CAA54221), PmSPS1 (QCX36371), PmSPS2 (QCX36372), and PsSTS1 (P48407). Proteins highlighted in blue have detectable enzyme activities *in vitro*. Protein sequences were aligned by MUSCLE and the phylogenetic tree was constructed by RAxML using a maximum likelihood method.



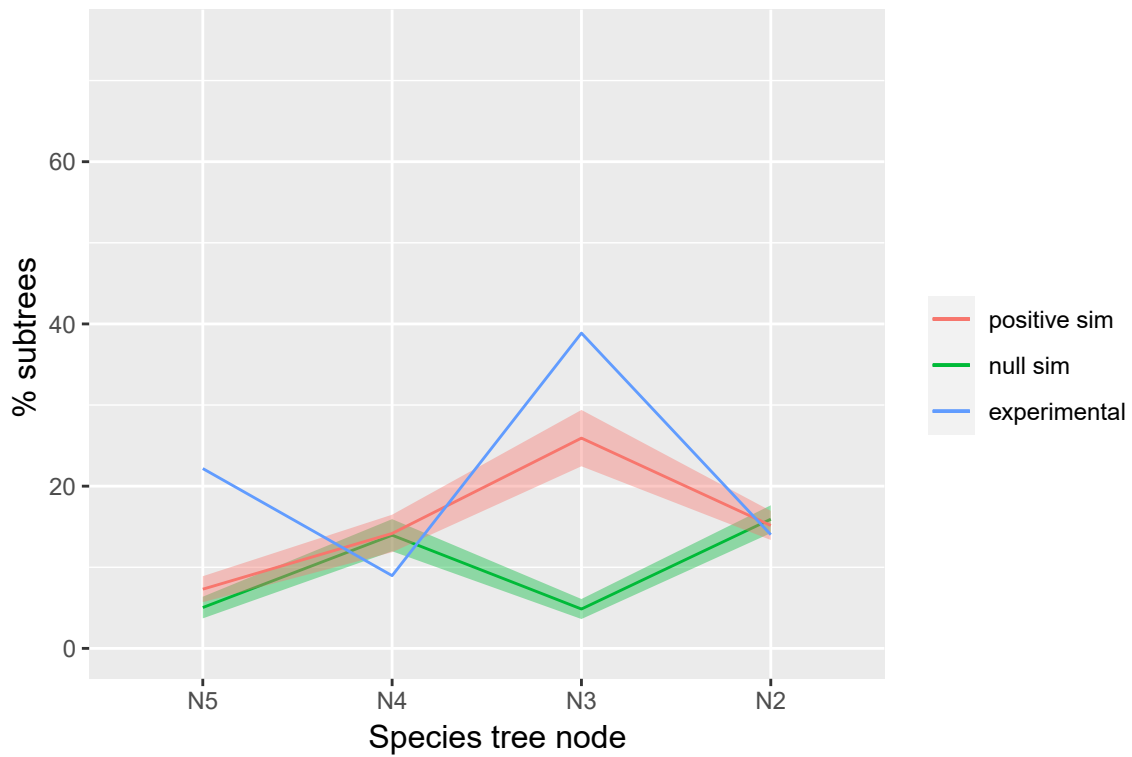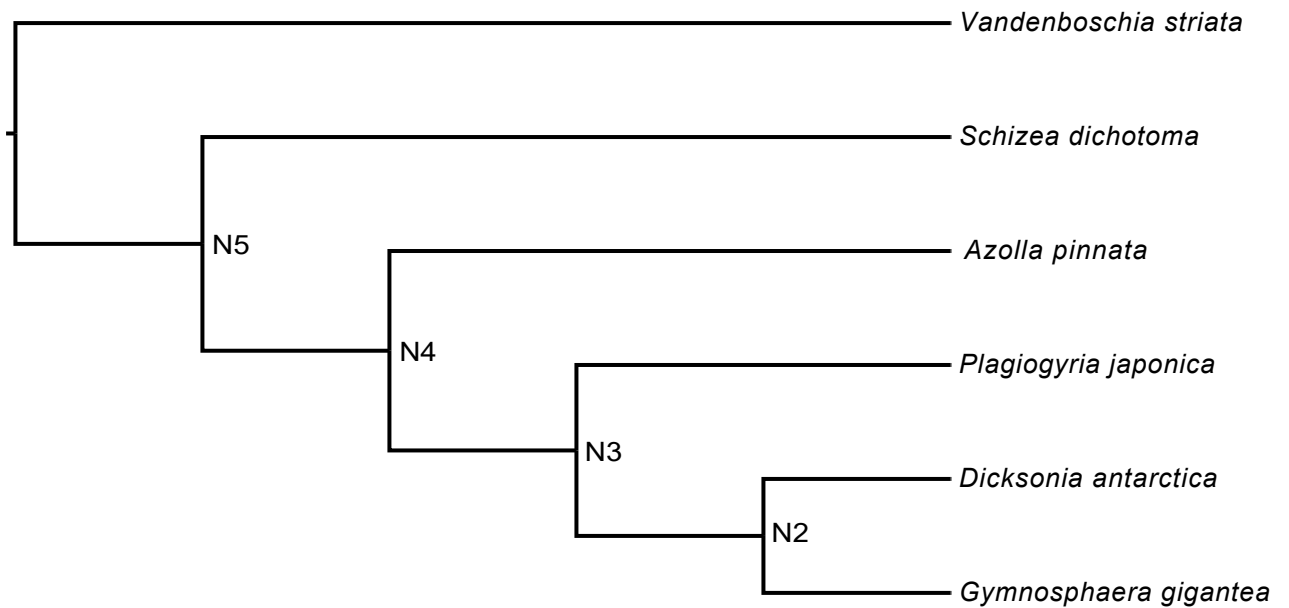

**Supplementary Figure 11. MAPS analysis of Cyatheaales WGD event excluding *A. spinulosa*.** A Cyatheaales-wide WGD event was still detected when *A. spinulosa* was excluded from the MAPS analysis. The percentage of subtrees supporting a WGD at or before N3 was significantly higher than null and positive simulations according to an one-sided Fischer's Exact Test ( $P < 0.005$ ). The dark lines in the center of the shaded regions represent the average values for null and positive gene tree simulations.

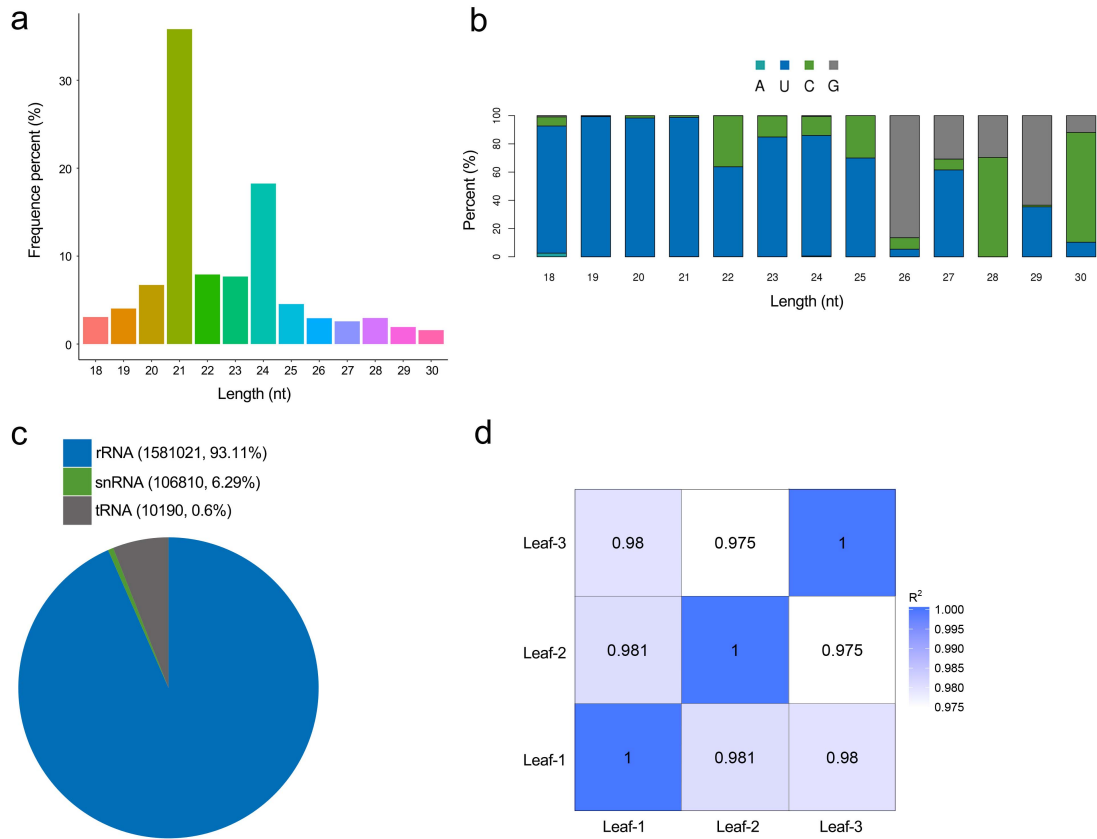

**Supplementary Figure 12. Characterization of small RNA in *A. spinulosa* leaves.**

**a**, Length distribution of small RNAs. 21 nt length of sRNA reads are the most abundant, occupying 34.72%. **b**, First nucleotide bias of miRNAs, mainly trending to be uracil. **c**, Annotation of non-coding RNAs (ncRNAs), including rRNA, tRNA, snRNA and snoRNA. Of which, 93.11% are rRNAs and there is no snoRNA in *A. spinulosa*. **d**, Pearson correlation analysis among three leaf samples shows a high correlation coefficient of miRNA TPM values ( $R^2 > 0.97$ ), indicating a quite good repeatability.

## Supplementary Tables

**Supplementary Table 1.** Statistics of clean sequencing data generated from the PacBio Sequel platforms, Illumina and Hi-C sequencing in *A. spinulosa*.

| PacBio data               |                  |                   |                    |                        |                        |
|---------------------------|------------------|-------------------|--------------------|------------------------|------------------------|
| Platform                  | Insert size (kb) | SMRT cell number  | Clean data (Gb)    | N50 length (bp)        | Depth <sup>1</sup> (X) |
| Sequel I                  | 20               | 73                | 442.72             | 15,543                 | 71.06                  |
| Sequel II                 | 20               | 3                 | 460.15             | 23,021                 | 73.86                  |
| Total                     | -                | 76                | 902.87             | -                      | 144.92                 |
| Illumina data             |                  |                   |                    |                        |                        |
| Insert size               | Type             | Reads length (bp) | No. of clean reads | Total clean bases (bp) | Depth <sup>1</sup> (X) |
| 270 bp                    | Paired-end       | 150               | 2,577,465,130      | 386,619,769,500        | 62.06                  |
| 500 bp                    | Paired-end       | 150               | 2,644,833,362      | 396,725,004,300        | 63.68                  |
| Total                     | -                | -                 | 5,222,298,492      | 783,344,773,800        | 125.74                 |
| Hi-C data                 |                  |                   |                    |                        |                        |
| Type                      | Read number      | Base number (bp)  | Ratio (%)          | Depth <sup>1</sup> (X) |                        |
| Total clean data          | 1,331,223,757    | 399,367,127,100   | -                  | 64.10                  |                        |
| Mapped paired-end reads   | 1,047,707,917    | 314,312,375,100   | 78.70              | -                      |                        |
| Unmapped paired-end reads | 10,364,629       | 3,109,388,700     | 0.78               | -                      |                        |
| Valid data                | 301,657,590      | 120,497,277,000   | 30.17              | -                      |                        |

<sup>1</sup>Depth was calculated under the assumption of a genome size of 6.23 Gb.

**Supplementary Table 2.** Statistics for the chromosome-level assembly of the *A. spinulosa* genome.

|                  | <b>Scaffold length<br/>(bp)</b> | <b>Number</b> | <b>Contig* length<br/>(bp)</b> | <b>Number</b> |
|------------------|---------------------------------|---------------|--------------------------------|---------------|
| N10 <sup>1</sup> | 112,454,994                     | 5             | 4,372,444                      | 112           |
| N20              | 104,380,601                     | 11            | 3,288,578                      | 277           |
| N30              | 100,365,623                     | 17            | 2,700,726                      | 488           |
| N40              | 95,373,544                      | 24            | 2,220,203                      | 741           |
| N50              | 92,484,196                      | 30            | 1,795,171                      | 1,056         |
| N60              | 88,178,156                      | 37            | 1,417,007                      | 1,445         |
| N70              | 81,981,237                      | 45            | 1,073,001                      | 1,956         |
| N80              | 79,385,870                      | 52            | 749,984                        | 2,651         |
| N90              | 71,293,965                      | 61            | 419,601                        | 3,737         |
| Maximum length   | 135,221,733                     | -             | 9,774,507                      | -             |
| Total length     | 6,234,337,617                   | -             | 6,230,791,617                  | -             |
| Total number     | -                               | 69            | -                              | 7161          |
| GC content       | 42.1%                           | -             | 42.1%                          | -             |

<sup>1</sup>N10 refers to the size above which 10% of the total length of the sequence assembly can be found. From N20 to N90 are similarly defined. \* indicates contig after scaffolding.

**Supplementary Table 3.** BUSCO assessments of *A. spinulosa* genome assembly and annotation using Eukaryota\_odb10 dataset (10 September, 2020).

| <b>Assembly assessment</b>      |               |                       |
|---------------------------------|---------------|-----------------------|
|                                 | <b>Number</b> | <b>Percentage (%)</b> |
| Complete BUSCOs                 | 249           | 97.6                  |
| Complete and single-copy BUSCOs | 203           | 79.6                  |
| Complete and duplicated BUSCOs  | 46            | 18.0                  |
| Fragmented BUSCOs               | 3             | 1.2                   |
| Missing BUSCOs                  | 3             | 1.2                   |
| Total BUSCOs groups searched    | 255           | -                     |
| <b>Annotation assessment</b>    |               |                       |
|                                 | <b>Number</b> | <b>Percentage (%)</b> |
| Complete BUSCOs                 | 184           | 72.1                  |
| Complete and single-copy BUSCOs | 151           | 59.2                  |
| Complete and duplicated BUSCOs  | 33            | 12.9                  |
| Fragmented BUSCOs               | 55            | 21.6                  |
| Missing BUSCOs                  | 16            | 6.3                   |
| Total BUSCOs groups searched    | 255           | -                     |

**Supplementary Table 4.** Statistics of repeat sequences in *A. spinulosa* genome.

|                          | <b>Length (bp)</b> | <b>% of genome</b> |
|--------------------------|--------------------|--------------------|
| Class I: Retrotransposon | 2,520,569,120      | 40.43              |
| LTR-Retrotransposon      | 2,353,496,477      | 37.75              |
| LTR/Copia                | 777,705,955        | 12.47              |
| LTR/Gypsy                | 1,553,536,402      | 24.91              |
| LTR-other                | 22,254,120         | 0.37               |
| Non-LTR Retrotransposon  | 167,072,643        | 2.70               |
| SINE                     | 2,103,182          | 0.03               |
| LINE                     | 166,664,081        | 2.67               |
| Class II:DNA Transposon  | 157,368,721        | 2.52               |
| CMC-EnSpm                | 37,224,336         | 0.59               |
| MULE-MuDR                | 16,810,091         | 0.26               |
| hAT-Tag1                 | 12,699,458         | 0.20               |
| TcMar-Tc2                | 12,573,034         | 0.20               |
| hAT                      | 12,247,640         | 0.19               |
| TcMar-Tc1                | 11,945,278         | 0.19               |
| Sola-1                   | 11,337,487         | 0.18               |
| PIF-Harbinger            | 7,273,667          | 0.11               |
| Sola-2                   | 4,807,706          | 0.07               |
| Low Complexity           | 28,370,389         | 0.45               |
| Tandem repeat            | 663,557,047        | 10.64              |
| Unknown                  | 1,286,756,815      | 20.63              |
| Total content            | 4,685,835,730      | 75.15              |

**Supplementary Table 5.** Statistics of gene numbers and features in *A. spinulosa*.

| <b>Gene numbers and features</b> |                     |
|----------------------------------|---------------------|
| Gene_count                       | 67,831              |
| Gene_max                         | 207,196 bp          |
| Gene_min                         | 102 bp              |
| Gene_Median / Average            | 2,382 / 9,542.41 bp |
| CDS_count                        | 67,831              |
| CDS_max                          | 47,169 bp           |
| CDS_min                          | 102 bp              |
| CDS_Median / Average             | 879 / 1,135.58 bp   |
| cDNA_count                       | 67,831              |
| cDNA_max                         | 48,726 bp           |
| cDNA_min                         | 102 bp              |
| cDNA_Median / Average            | 1,095 / 1,396.61 bp |
| mRNA_count                       | 71,488              |
| mRNA_max                         | 207,196 bp          |
| mRNA_min                         | 102 bp              |
| mRNA_Median / Average            | 2,472 / 9,762.09 bp |
| mRNA_count_Median / Average      | 1 / 1.03            |
| UTR3_Median / Average            | 296 / 392.35 bp     |
| UTR5_Median / Average            | 137 / 284.47 bp     |
| Exon_Median / Average            | 553 / 711.40 bp     |
| Exon_count_Median / Average      | 2 / 3.76            |
| Intron_Median / Average          | 566 / 8,130.30 bp   |
| Intron_count_Median / Average    | 1 / 2.61            |

**Supplementary Table 6.** Gene functional annotation in the *A. spinulosa* genome.

| <b>Dataset</b>       | <b>Number</b> | <b>Percent (%)</b> |
|----------------------|---------------|--------------------|
| Nr                   | 63,551        | 93.69              |
| Swiss-Prot           | 35,772        | 52.73              |
| KOG                  | 14,040        | 20.69              |
| eggNOG               | 58,208        | 85.81              |
| InterPro             | 52,284        | 77.07              |
| Pfam                 | 44,813        | 66.06              |
| GO                   | 35,549        | 52.4               |
| KEGG                 | 9,665         | 14.24              |
| All functional genes | 64,688        | 95.36              |



**Supplementary Table 7.** Genome structure comparisons between *Alsophila spinulosa* and *Arabidopsis thaliana* TAIR10.

|                              | <i>A. spinulosa</i> | <i>A. thaliana</i> |
|------------------------------|---------------------|--------------------|
| Total gene number            | 67,831              | 27,655             |
| Average gene length (bp)     | 9,542.41            | 2,373.54           |
| Average CDS length (bp)      | 1,135.58            | 1,201.52           |
| Average exon number per gene | 3.76                | 5.28               |
| Average exon length (bp)     | 711.40              | 1620.03            |
| Average intron length (bp)   | 8,130.30            | 709.71             |

**Supplementary Table 8.** Statistics of gene family numbers related to lignin biosynthesis among *Alsophila spinulosa*, *Azolla filiculoides*, and *Salvinia cucullata*.

| <b>Gene family</b> | <b><i>A. spinulosa</i></b> | <b><i>A. filiculoides</i></b> | <b><i>S. cucullata</i></b> |
|--------------------|----------------------------|-------------------------------|----------------------------|
| <i>PAL</i>         | 22                         | 9                             | 6                          |
| <i>4CL</i>         | 50                         | 26                            | 26                         |
| <i>CCR</i>         | 42                         | 25                            | 20                         |
| <i>CAD</i>         | 51                         | 20                            | 21                         |
| <i>CCoAOMT</i>     | 9                          | 3                             | 2                          |
| <i>COMT</i>        | 33                         | 7                             | 5                          |
| <i>CSE</i>         | 37                         | 26                            | 16                         |
| <i>HCT</i>         | 130                        | 15                            | 18                         |
| <i>P450</i>        | 331                        | 100                           | 77                         |

**Supplementary Table 9.** 17 pairs of WGD genes in 8 gene families related to lignin biosynthetic pathway.

| <b>Gene_1</b>                               | <b>Gene_2</b>                               | <b>Gene family</b> | <b>Median block Ks</b> | <b>Collinear (+/-)</b> |
|---------------------------------------------|---------------------------------------------|--------------------|------------------------|------------------------|
| Aspi01Gene07514<br>( <i>AspiPAL5a</i> )     | Aspi01Gene05547<br>( <i>AspiPAL5b</i> )     | <i>PAL</i>         | 0.4526                 | +                      |
| Aspi01Gene12760<br>( <i>Aspi4CL1a</i> )     | Aspi01Gene46333<br>( <i>Aspi4CL1b</i> )     | <i>4CL</i>         | 0.3885                 | +                      |
| Aspi01Gene22852<br>( <i>Aspi4CL2a</i> )     | Aspi01Gene25649<br>( <i>Aspi4CL2b</i> )     | <i>4CL</i>         | 0.4316                 | +                      |
| Aspi01Gene09501<br>( <i>AspiCAD2a</i> )     | Aspi01Gene43243<br>( <i>AspiCAD2b</i> )     | <i>CAD</i>         | 0.3598                 | +                      |
| Aspi01Gene29611<br>( <i>AspiCAD3a</i> )     | Aspi01Gene66730<br>( <i>AspiCAD3b</i> )     | <i>CAD</i>         | 0.2681                 | +                      |
| Aspi01Gene01252<br>( <i>AspiCCR1a</i> )     | Aspi01Gene28475<br>( <i>AspiCCR1b</i> )     | <i>CCR</i>         | 0.3924                 | +                      |
| Aspi01Gene54723<br>( <i>AspiCCR2a</i> )     | Aspi01Gene71938<br>( <i>AspiCCR2b</i> )     | <i>CCR</i>         | 0.3289                 | +                      |
| Aspi01Gene01343<br>( <i>AspiCCR3a</i> )     | Aspi01Gene28411<br>( <i>AspiCCR3b</i> )     | <i>CCR</i>         | 0.3997                 | +                      |
| Aspi01Gene01596<br>( <i>AspiCCR4a</i> )     | Aspi01Gene28121<br>( <i>AspiCCR4b</i> )     | <i>CCR</i>         | 0.3457                 | +                      |
| Aspi01Gene24006<br>( <i>AspiCCR5a</i> )     | Aspi01Gene20254<br>( <i>AspiCCR5b</i> )     | <i>CCR</i>         | 0.4534                 | +                      |
| Aspi01Gene29511<br>( <i>AspiCCR6a</i> )     | Aspi01Gene66601<br>( <i>AspiCCR6b</i> )     | <i>CCR</i>         | 0.3079                 | +                      |
| Aspi01Gene43044<br>( <i>AspiCCoAOMT3a</i> ) | Aspi01Gene45864<br>( <i>AspiCCoAOMT3b</i> ) | <i>CCoAOMT</i>     | 0.4328                 | +                      |
| Aspi01Gene53484<br>( <i>AspiCSE2a</i> )     | Aspi01Gene19235<br>( <i>AspiCSE2b</i> )     | <i>CSE</i>         | 0.4093                 | +                      |
| Aspi01Gene31960<br>( <i>AspiCSE3a</i> )     | Aspi01Gene30587<br>( <i>AspiCSE3b</i> )     | <i>CSE</i>         | 0.4054                 | +                      |
| Aspi01Gene50432<br>( <i>AspiHCT1a</i> )     | Aspi01Gene62633<br>( <i>AspiHCT1b</i> )     | <i>HCT</i>         | 0.3389                 | +                      |
| Aspi01Gene09518<br>( <i>AspiHCT2a</i> )     | Aspi01Gene43257<br>( <i>AspiHCT2b</i> )     | <i>HCT</i>         | 0.3598                 | +                      |
| Aspi01Gene72914<br>( <i>AspiC3H1a</i> )     | Aspi01Gene37809<br>( <i>AspiC3H1b</i> )     | <i>C3H</i>         | 0.4842                 | +                      |

**Supplementary Table 10.** Numbers of 15 gene families expanded in *A. spinulosa* compared to *A. filiculoides* and *S. cucullata* by OrthoFinder analysis. Peroxidase (Hmm: peroxidase, PF00141); MYB (Hmm: MYB\_DNA-binding, PF00249); NAC (Hmm: NAM, PF02365); MADS-box (Hmm: SRF-TF, PF00319); bHLH (Basic helix-loop-helix, Hmm: HLH, PF00010); Cupin\_1 (Hmm: Cupin\_1, PF00190); POT (Proton-dependent oligopeptide transporter, Hmm: PTR2, PF00854); SAUR (Small auxin-up RNA, Hmm: Auxin inducible, PF02519); HMA (Heavy metal associated, Hmm: HMA, PF00403); NPH3 (Non-phototropic hypocotyl 3, Hmm: NPH3, PF03000); PE (Pectinesterase, Hmm: Pectinesterase, PF01095); HSP20 (Heat shock protein, Hmm: HSP20, PF00011); LOB (Lateral organ boundaries, Hmm: LOB, PF03195); GATA (GATA zinc finger, Hmm: GATA, PF00320); GH3 (GH3 auxin-responsive promoter, Hmm: GH3, PF03321).

| Gene family | <i>C. braunii</i> | <i>A. angustus</i> | <i>M. polymorpha</i> | <i>P. patens</i> | <i>S. cucullata</i> | <i>A. filiculoides</i> | <i>A. spinulosa</i> | <i>G. montanum</i> | <i>G. biloba</i> | <i>A. trichopoda</i> | <i>A. thaliana</i> | <i>S. tamariscina</i> |
|-------------|-------------------|--------------------|----------------------|------------------|---------------------|------------------------|---------------------|--------------------|------------------|----------------------|--------------------|-----------------------|
| Peroxidase  | 12                | 32                 | 115                  | 42               | 21                  | 24                     | 82                  | 53                 | 85               | 48                   | 66                 | 53                    |
| MYB         | 6                 | 12                 | 30                   | 50               | 43                  | 48                     | 115                 | 48                 | 95               | 67                   | 115                | 46                    |
| NAC         | 1                 | 5                  | 8                    | 26               | 26                  | 29                     | 65                  | 35                 | 36               | 36                   | 58                 | 27                    |
| MADS-box    | 4                 | 12                 | 2                    | 8                | 19                  | 22                     | 51                  | 29                 | 33               | 26                   | 44                 | 15                    |
| bHLH        | 4                 | 7                  | 11                   | 29               | 23                  | 23                     | 65                  | 18                 | 21               | 20                   | 30                 | 10                    |
| Cupin_1     | 0                 | 12                 | 23                   | 23               | 7                   | 10                     | 78                  | 8                  | 35               | 25                   | 29                 | 8                     |
| POT         | 0                 | 23                 | 24                   | 20               | 9                   | 13                     | 26                  | 26                 | 53               | 33                   | 27                 | 29                    |
| SAUR        | 1                 | 7                  | 6                    | 19               | 14                  | 12                     | 27                  | 31                 | 47               | 27                   | 37                 | 45                    |
| HMA         | 1                 | 9                  | 25                   | 17               | 9                   | 8                      | 35                  | 25                 | 32               | 14                   | 31                 | 14                    |
| NPH3        | 6                 | 5                  | 6                    | 31               | 27                  | 20                     | 31                  | 20                 | 22               | 22                   | 30                 | 24                    |
| PE          | 9                 | 12                 | 7                    | 18               | 17                  | 23                     | 51                  | 10                 | 15               | 11                   | 8                  | 14                    |
| HSP20       | 4                 | 13                 | 13                   | 15               | 8                   | 8                      | 23                  | 21                 | 26               | 12                   | 7                  | 1                     |
| LOB         | 1                 | 4                  | 8                    | 15               | 8                   | 5                      | 24                  | 15                 | 34               | 8                    | 13                 | 7                     |
| GATA        | 2                 | 2                  | 2                    | 9                | 14                  | 12                     | 21                  | 15                 | 15               | 14                   | 26                 | 4                     |
| GH3         | 0                 | 11                 | 2                    | 2                | 5                   | 10                     | 40                  | 16                 | 16               | 7                    | 19                 | 7                     |

**Supplementary Table 11.** The content detection of lignin and compositions in four tissues (xylem, phloem, sclerenchymatic belt, and spore).

| Tissue               | Acid-insoluble lignin (% CWR) | Acid soluble lignin (% CWR) | H ( $\mu\text{mol/g}$ CWR) | G ( $\mu\text{mol/g}$ CWR) | S ( $\mu\text{mol/g}$ CWR) |
|----------------------|-------------------------------|-----------------------------|----------------------------|----------------------------|----------------------------|
| Xylem                | 36.30 $\pm$ 0.02              | 3.62 $\pm$ 0.01             | 7.10 $\pm$ 0.05            | 305.94 $\pm$ 0.21          | 0.12 $\pm$ 0.001           |
| Phloem               | 10.22 $\pm$ 1.17              | 4.50 $\pm$ 0.02             | N.D.                       | 1.10 $\pm$ 0.02            | 0.06 $\pm$ 0.01            |
| Sclerenchymatic belt | 14.55 $\pm$ 1.03              | 2.24 $\pm$ 0.04             | N.D.                       | 0.32 $\pm$ 0.03            | 0.35 $\pm$ 0.02            |
| Spore                | 54.38 $\pm$ 0.35              | 2.97 $\pm$ 0.01             | 9.69 $\pm$ 0.24            | 104.05 $\pm$ 1.56          | 0.39 $\pm$ 0.16            |

**Supplementary Table 12.** Summary of genetic variation in 6 groups.

| Category                                | Nepal     | SC/GX/<br>GZ | FJ/TW      | YN         | HN         | XZ         |
|-----------------------------------------|-----------|--------------|------------|------------|------------|------------|
| <b>Sequence variants</b>                |           |              |            |            |            |            |
| SNPs                                    | 5,822,085 | 17,554,121   | 16,725,788 | 38,967,231 | 11,294,576 | 10,584,708 |
| Indels (<10 bp)                         | 821,522   | 1,280,228    | 1,195,712  | 4,346,215  | 911,058    | 910,829    |
| <b>Variants with effects on genes</b>   |           |              |            |            |            |            |
| SNPs that introduce stop codons         | 546       | 1,388        | 1,433      | 5,657      | 919        | 903        |
| SNPs that disrupt stop codons           | 63        | 211          | 101        | 481        | 111        | 115        |
| SNPs that induce alternative splicing   | 1,158     | 4,279        | 3,470      | 17,089     | 2,361      | 2,269      |
| Indels located in genic regions         | 721,495   | 1,325,424    | 1,239,420  | 4,503,329  | 942,022    | 942,948    |
| Frameshift indels                       | 1,252     | 2,335        | 2,143      | 9,694      | 1,638      | 1,655      |
| Genes affected by large-effect variants | 2,149     | 4,733        | 4,520      | 18,521     | 3,166      | 3,143      |
| Nonsynonymous variants                  | 16,186    | 46,594       | 46,842     | 153,526    | 26,709     | 28,189     |
| Synonymous variants                     | 9178      | 27,618       | 27,046     | 108,037    | 15,364     | 15,982     |

**Supplementary Table 13.** Summary of the variants in 6 groups.

| Type     | Subgroups | Number of re-sequenced accessions | Ratio of non-synonymous to synonymous SNPs |
|----------|-----------|-----------------------------------|--------------------------------------------|
| Nepal    | Nepal     | 12                                | 1.7019                                     |
| SC/GZ/GX | SiChuan   | 12                                | 1.6759                                     |
|          | GuiZhou   | 12                                | 1.6995                                     |
|          | GuangXi   | 12                                | 1.692                                      |
| FJ/TW    | FuJian    | 12                                | 1.7078                                     |
|          | TaiWan    | 12                                | 1.711                                      |
| YN       | YunNan    | 12                                | 1.4259                                     |
| HN       | HaiNan    | 12                                | 1.7467                                     |
| XZ       | XiZang    | 11                                | 1.7175                                     |

**Supplementary Table 14.** Fixation index (*Fst*) among 6 groups.

| <b>Population</b> | <b>Nepal</b> | <b>SC/GZ/GX</b> | <b>FJ/TW</b> | <b>YN</b> | <b>HN</b> | <b>XZ</b> |
|-------------------|--------------|-----------------|--------------|-----------|-----------|-----------|
| Nepal             |              |                 |              |           |           |           |
| SC/GZ/GX          | 0.221        |                 |              |           |           |           |
| FJ/TW             | 0.26888      | 0.18975         |              |           |           |           |
| YN                | 0.69679      | 0.73698         | 0.71212      |           |           |           |
| HN                | 0.33749      | 0.15285         | 0.19037      | 0.68319   |           |           |
| XZ                | 0.30071      | 0.17034         | 0.22975      | 0.67747   | 0.24102   |           |



**Supplementary Table 15.** GO and KEGG enrichment analysis of the protein-coding genes that are under selection. BP: biological process; CC: cellular component; MF: molecular function. Q-value less than 0.05 represented significant enrichment. P values were calculated using two-sided Fisher's exact test and further corrected based on Benjamini-Hochberg false discovery rate correction method.

| GO enrichment |            |                                                                       |         |         |                |
|---------------|------------|-----------------------------------------------------------------------|---------|---------|----------------|
| Category      | GO ID      | GO term                                                               | P-value | Q-value | Gene ratio (%) |
| MF            | GO:0008195 | phosphatidate phosphatase activity                                    | 0.000   | 0.000   | 0.012          |
| MF            | GO:0004345 | glucose-6-phosphate dehydrogenase activity                            | 0.000   | 0.001   | 0.012          |
| BP            | GO:0009051 | pentose-phosphate shunt, oxidative branch                             | 0.000   | 0.001   | 0.012          |
| BP            | GO:0034517 | ribophagy                                                             | 0.000   | 0.001   | 0.012          |
| BP            | GO:0035017 | cuticle pattern formation                                             | 0.000   | 0.001   | 0.012          |
| MF            | GO:1905538 | polysome binding                                                      | 0.000   | 0.001   | 0.012          |
| CC            | GO:1990861 | Ubp3-Bre5 deubiquitination complex                                    | 0.000   | 0.001   | 0.012          |
| BP            | GO:0006098 | pentose-phosphate shunt                                               | 0.000   | 0.002   | 0.012          |
| BP            | GO:0060628 | regulation of ER to Golgi vesicle-mediated transport                  | 0.000   | 0.002   | 0.012          |
| BP            | GO:0006414 | translational elongation                                              | 0.000   | 0.003   | 0.010          |
| BP            | GO:0006739 | NADP metabolic process                                                | 0.000   | 0.004   | 0.014          |
| MF            | GO:0000981 | DNA-binding transcription factor activity, RNA polymerase II-specific | 0.000   | 0.004   | 0.036          |
| BP            | GO:1901957 | regulation of cutin biosynthetic process                              | 0.000   | 0.004   | 0.012          |
| BP            | GO:0071497 | cellular response to freezing                                         | 0.000   | 0.006   | 0.014          |
| BP            | GO:0061912 | selective autophagy                                                   | 0.000   | 0.008   | 0.012          |
| BP            | GO:1990019 | protein storage vacuole organization                                  | 0.000   | 0.009   | 0.008          |
| BP            | GO:0032212 | positive regulation of telomere maintenance via telomerase            | 0.000   | 0.012   | 0.008          |
| BP            | GO:0070125 | mitochondrial translational elongation                                | 0.000   | 0.012   | 0.008          |
| BP            | GO:1904358 | positive regulation of telomere maintenance via telomere lengthening  | 0.000   | 0.012   | 0.008          |
| MF            | GO:0047714 | galactolipase activity                                                | 0.000   | 0.013   | 0.014          |
| BP            | GO:0032543 | mitochondrial translation                                             | 0.000   | 0.013   | 0.010          |
| MF            | GO:0008135 | translation factor activity, RNA binding                              | 0.000   | 0.014   | 0.016          |
| BP            | GO:0009751 | response to salicylic acid                                            | 0.000   | 0.014   | 0.036          |
| CC            | GO:0071020 | post-spliceosomal complex                                             | 0.000   | 0.017   | 0.012          |
| CC            | GO:0071021 | U2-type post-spliceosomal complex                                     | 0.000   | 0.017   | 0.012          |
| BP            | GO:0140053 | mitochondrial gene expression                                         | 0.000   | 0.017   | 0.012          |
| BP            | GO:0005996 | monosaccharide metabolic process                                      | 0.000   | 0.017   | 0.024          |

|    |            |                                                                         |       |       |       |
|----|------------|-------------------------------------------------------------------------|-------|-------|-------|
| BP | GO:0019318 | hexose metabolic process                                                | 0.000 | 0.017 | 0.020 |
| BP | GO:0000350 | generation of catalytic spliceosome for second transesterification step | 0.000 | 0.017 | 0.012 |
| MF | GO:0003746 | translation elongation factor activity                                  | 0.000 | 0.017 | 0.008 |
| BP | GO:0034605 | cellular response to heat                                               | 0.000 | 0.017 | 0.020 |
| BP | GO:1901371 | regulation of leaf morphogenesis                                        | 0.000 | 0.017 | 0.008 |
| BP | GO:0019682 | glyceraldehyde-3-phosphate metabolic process                            | 0.000 | 0.020 | 0.012 |
| MF | GO:0008970 | phospholipase A1 activity                                               | 0.001 | 0.021 | 0.014 |
| BP | GO:0032210 | regulation of telomere maintenance via telomerase                       | 0.001 | 0.022 | 0.010 |
| BP | GO:0048736 | appendage development                                                   | 0.001 | 0.022 | 0.010 |
| BP | GO:0090596 | sensory organ morphogenesis                                             | 0.001 | 0.022 | 0.010 |
| MF | GO:0004806 | triglyceride lipase activity                                            | 0.001 | 0.022 | 0.014 |
| BP | GO:0045292 | mRNA cis splicing, via spliceosome                                      | 0.001 | 0.024 | 0.012 |
| BP | GO:1904356 | regulation of telomere maintenance via telomere lengthening             | 0.001 | 0.025 | 0.010 |
| BP | GO:0048235 | pollen sperm cell differentiation                                       | 0.001 | 0.026 | 0.012 |
| BP | GO:0000018 | regulation of DNA recombination                                         | 0.001 | 0.027 | 0.020 |
| BP | GO:0000002 | mitochondrial genome maintenance                                        | 0.001 | 0.027 | 0.022 |
| BP | GO:0050826 | response to freezing                                                    | 0.001 | 0.027 | 0.014 |
| BP | GO:0045910 | negative regulation of DNA recombination                                | 0.001 | 0.030 | 0.018 |
| BP | GO:0000393 | spliceosomal conformational changes to generate catalytic conformation  | 0.001 | 0.039 | 0.012 |
| BP | GO:0006006 | glucose metabolic process                                               | 0.001 | 0.039 | 0.014 |
| BP | GO:0006081 | cellular aldehyde metabolic process                                     | 0.001 | 0.039 | 0.018 |
| BP | GO:0046677 | response to antibiotic                                                  | 0.001 | 0.041 | 0.048 |
| BP | GO:0007423 | sensory organ development                                               | 0.002 | 0.047 | 0.010 |
| BP | GO:0043171 | peptide catabolic process                                               | 0.002 | 0.047 | 0.010 |

#### KEGG enrichment

| Pathway                               | Ko ID   | P-value | Q-value | Gene ratio (%) |
|---------------------------------------|---------|---------|---------|----------------|
| Regulation of lipolysis in adipocytes | ko04923 | 0.000   | 0.033   | 0.014          |
| Glutathione metabolism                | ko00480 | 0.000   | 0.033   | 0.031          |
| Glycerolipid metabolism               | ko00561 | 0.000   | 0.042   | 0.035          |

**Supplementary Table 16.** Primers used in this study for qRT-PCR and gene cloning.

| Gene name                                | Forward Sequence (5'→3')     | Reverse Sequence (5'→3')    |
|------------------------------------------|------------------------------|-----------------------------|
| <b>qRT-PCR</b>                           |                              |                             |
| <i>AspiPAL3</i>                          | ATGGTTCAGACCTACTTTGAGTCAACAG | CGAGGGTGACGATAGCTGCTTCTCC   |
| <i>AspiCCR2b</i>                         | TGCCATTAATCATCCTCTCTTGCCA    | TGATTAGAAAGCAAGGATGGAGGGAAA |
| <i>AspiHCT40</i>                         | CTGGTTCCTGGCGTTACCA          | AGGGCGTGCAACAAGTAGGAG       |
| <i>AspiHCT101</i>                        | TGCTAAGCCTACCAGGAGACAC       | CCTCTGCAGGATCTTTCTCCGT      |
| <i>AspiC4H4</i>                          | GCCCGGTCTTAATGTGTTCGC        | TCCGCCGACTCTGTCAAACA        |
| <i>AspiCSE6</i>                          | GCCTGCGAGGAGCAAGAGTA         | GCAGATGCAAGCGGATGGTG        |
| <i>AspiCAD19</i>                         | GTTCTGTAAAGCACACTGCCA        | AGGCCCAACTGCAGTAACCA        |
| <i>Aspi4CL28</i>                         | CATCCTTGACAGAGGTCATGTGC      | TGGAGACATTGGGAAATCGTGCT     |
| <i>Aspi4CL43</i>                         | GGCATCCTTCTCCCTCTGGTC        | CCCTCCACATCCACTGTCA         |
| <i>AspiCCR10</i>                         | GGGAACCTAGCACTTCCTTG         | CCACAGATTTGGACGTCGCTT       |
| <i>AspiCcoAOMT2</i>                      | ACCATGGCACCAACTCACCGTAACC    | GGAAGACCGCAACAACAACAGG      |
| <i>AspiCOMT2</i>                         | CTCTCCACAGCTGCCGTTT          | GCAACACCTAGGCCTATAAAGTTC    |
| <i>AspiC3H3</i>                          | GAATCATCGTCGGCAGCAGA         | CTGTGGAACCGCATGTCACG        |
| <i>AspiCcoAOMT3a</i>                     | GTTTCCATTGGAGACGGGAT         | TGTGTGCCATAAATAGCCCTTGC     |
| <i>AspiCOMT16</i>                        | GTGTTGGAAGGGCGTGTTCG         | TGCATTCCGGCAAGCGTAAC        |
| <i>AspiCAD32</i>                         | TGCCATTCGGACCTTACCA          | AGCCCTTACCTTGGAAACC         |
| <i>AspiHCT85</i>                         | GTGCAAGGGCTGCCAATACC         | TCAGGCTTTGGAGGTGGCTT        |
| <i>AspiHCT64</i>                         | GCTAGCTTCTGCAGCTTGGTATG      | ATGGCGCTTGGAAACAATGG        |
| <i>AspiCSE18</i>                         | CCAAGGGTGTGGCCTCTCAG         | AGACTCTCAAACAGAAAGCAAGGA    |
| <i>Aspi4CL5</i>                          | AGAGAGCAAGCCTAATCGGAACT      | AGAGCATCACGAATGTTAGCACAC    |
| <i>AspiHCT1a</i>                         | ACAGATCCAACCTCCTGCACTC       | CCTCACAGACTTTAGGTTATGAGG    |
| <i>AspiHCT1b</i>                         | CACCAGCTGAGGAGACACCA         | GAAGCCTCCAGCCATTGGA         |
| <i>AspiPAL4</i>                          | CACTGGCTGAGAATTCCTGCAC       | GGACGAGATAAGGGAGCTGCTATC    |
| <i>Aspi4CL47</i>                         | GCTGTAAGGAGGATAGTTGTAAG      | GTGGTAACTTCCCAACTCAAGC      |
| <i>AspiCCR5a</i>                         | CTTCGTCTCTTGCTGCACGC         | GAGAAGGTGTAGTCGCCATAGC      |
| <i>AspiCSE3a</i>                         | GGTATTCCAAGACATCATTGCG       | CACATGCTGCATGGATGGAG        |
| <i>AspiCCR5b</i>                         | GGTGTGCACTCAACGGCATCTATG     | AGATGGAGATGCGGAGCTTG        |
| <i>Aspi4CL1b</i>                         | GTTCCACGGGGCCAAATCAA         | CAGCTTGGTCAAGCTACTCCTAAC    |
| <i>AspiC4H1</i>                          | CAAACCCCTCTAACCTGCCTCCTT     | CAAGAGCACTTCAAGACCTACAAG    |
| Aspi01 Gene06595<br>( <i>AspiActin</i> ) | CTTTTCAATCCACACTTCCACAG      | GCAACATTGCCAGGCAAATGCTC     |
| <b>Gene Cloning</b>                      |                              |                             |
| Aspi01 Gene02765                         | TGGTGGTGGTGAATTCTAGACATGACT  | CAGTCACGATGAATTAAGCTTTAACTG |

|                                        |                                                   |                                                   |
|----------------------------------------|---------------------------------------------------|---------------------------------------------------|
| ( <i>AspiPKS1</i> )                    | GTCTCTGAGAGTGCACG                                 | AGAGGCACACTCCTGA                                  |
| Aspi01Gene44865<br>( <i>AspiPKS2</i> ) | TGGTGGTGGTGGAATTCTAGACATGCCG<br>ATTCCTCCGGCTCCT   | CAGTCACGATGAATTAAGCTTTCAATTA<br>GTGAGAGGCACGCT    |
| Aspi01Gene51163<br>( <i>AspiPKS3</i> ) | TGGTGGTGGTGGAATTCTAGACATGACC<br>ATCGCTGAGTCTGGC   | CAGTCACGATGAATTAAGCTTTTAACTG<br>GCGAGCGGGACACTGCG |
| Aspi01Gene15356<br>( <i>AspiPKS4</i> ) | TGGTGGTGGTGGAATTCTAGACATGTTT<br>CTGGAGGTGGAAGTTG  | CAGTCACGATGAATTAAGCTTTTACTTG<br>CACCGCCTGAGGAGG   |
| Aspi01Gene15357<br>( <i>AspiPKS5</i> ) | TGGTGGTGGTGGAATTCTAGACATGTTT<br>CTGGAGGTGGAAGTTG  | CAGTCACGATGAATTAAGCTTTCATTG<br>CACCGCTTGAGAAG     |
| Aspi01Gene19041<br>( <i>AspiPKS6</i> ) | TGGTGGTGGTGGAATTCTAGACATGTTT<br>CTGGAGGTGCGAGGTAG | CAGTCACGATGAATTAAGCTTTTAACTG<br>GATGCAGGCTTGC     |
| Aspi01Gene18241<br>( <i>AspiPKS7</i> ) | TGGTGGTGGTGGAATTCTAGACATGTTT<br>CTGGAGATCGAAGTGG  | CAGTCACGATGAATTAAGCTTTCATTG<br>CACCGCTTGAGGAG     |
| Aspi01Gene01559<br>( <i>AspiPKS8</i> ) | TGGTGGTGGTGGAATTCTAGACATGGA<br>GTGCAATAGTGTGCAC   | CAGTCACGATGAATTAAGCTTTCATTGA<br>TGTGTTACCTTTCGA   |

**Supplementary Table 17.** The pfam numbers and blastp queries for gene family identification in this study.

| Category           | Gene family | Pfam number        | Blastp query                                | Query species                                       |
|--------------------|-------------|--------------------|---------------------------------------------|-----------------------------------------------------|
| TF                 | MADS-box    | PF00319            | -                                           | -                                                   |
|                    | NAC         | PF02365            | -                                           | -                                                   |
| Lignin             | PAL         | PF00221            | -                                           | -                                                   |
|                    | 4CL         | PF00501            | -                                           | -                                                   |
|                    | C4H         | PF00067            | Potri.019G130700.1<br>( <i>PtrC4H2</i> )    | <i>Populus trichocarpa</i>                          |
|                    | C3H         |                    | Potri.006G033300.1<br>( <i>PtrC3H3</i> )    | <i>Populus trichocarpa</i>                          |
|                    | CAld5H      |                    | Potri.007G016400.1<br>( <i>PtrCAld5H2</i> ) | <i>Populus trichocarpa</i>                          |
|                    | CCoAOMT     | PF01596            | -                                           | -                                                   |
|                    | CAD         | PF08240<br>PF00107 | -                                           | -                                                   |
|                    | CCR         | PF01370            | -                                           | -                                                   |
|                    | COMT        | PF00891            | -                                           | -                                                   |
|                    | CSE         | PF12146            | -                                           | -                                                   |
|                    | HCT         | PF02458            | -                                           | -                                                   |
| Flavonoid          | CHS         | PF00195<br>PF02797 | <i>AtCHS</i> (AT5G13930)                    | <i>Arabidopsis thaliana</i>                         |
|                    | CHI         | -                  | <i>AtCHI</i> (AT3G55120)                    | <i>Arabidopsis thaliana</i>                         |
|                    | FLS         | -                  | <i>AtFLS1</i> (AT5G08640)                   | <i>Arabidopsis thaliana</i>                         |
|                    | F3H         | -                  | <i>AtF3H</i> (AT3G51240)                    | <i>Arabidopsis thaliana</i>                         |
|                    | F3'H        | PF00067            | Rhsim07G0001300.1                           | <i>Rhododendron simsii</i>                          |
|                    | F3'5'H      |                    | A6XHG1 (UniprotKB)、<br>E9P1T5 (UniprotKB)   | <i>Vitis vinifera</i> 、<br><i>Solanum tuberosum</i> |
|                    | FNS         |                    | LjFNSII-1.1、LjFNSII-2.1                     | <i>Lonicera japonica</i>                            |
|                    | GT          | PF00201            | -                                           | -                                                   |
| PKS                | PKSIII      | -                  | <i>VvSTS</i> (GenBank:<br>CAA54221)         | <i>Vitis vinifera</i>                               |
|                    |             |                    | <i>PmSPS1</i> (GenBank:<br>QCX36371)        | <i>Piper methysticum</i>                            |
| DNA<br>methylation | DRM         | -                  | <i>DRM2</i> (AT5G14620)                     | <i>Arabidopsis thaliana</i>                         |
|                    | MET         | -                  | <i>MET1</i> (AT5G49160)                     | <i>Arabidopsis thaliana</i>                         |
|                    | CMT         | -                  | <i>CMT2</i> (AT4G19020)                     | <i>Arabidopsis thaliana</i>                         |

**Supplementary Table 18.** Statistics of known and novel miRNAs in *A. spinulosa*.

| miRNA           | Type              | Leaf-1    | Leaf-2  | Leaf-3  | Total     |
|-----------------|-------------------|-----------|---------|---------|-----------|
| Known<br>miRNAs | Mapped mature     | 142       | 163     | 145     | 182       |
|                 | Mapped hairpin    | 326       | 399     | 386     | 453       |
|                 | Mapped uniq sRNA* | 479       | 565     | 465     | 1509      |
|                 | Mapped total sRNA | 1,063,675 | 996,680 | 801,399 | 2,861,754 |
| Novel<br>miRNAs | Mapped mature     | 181       | 181     | 181     | 181       |
|                 | Mapped hairpin    | 181       | 181     | 181     | 181       |
|                 | Mapped uniq sRNA* | 1028      | 1054    | 1023    | 3105      |
|                 | Mapped total sRNA | 489,139   | 535,545 | 430,116 | 1,454,800 |

\*indicated categories of mapped sRNA.

**Supplementary Table 19.** Read counts of four kinds of ncRNAs in *A. spinulosa*.

| Type   | Leaf-1    | Leaf-2    | Leaf-3    | Average   | Percent (%) |
|--------|-----------|-----------|-----------|-----------|-------------|
| rRNA   | 1,446,727 | 1,689,607 | 1,606,728 | 1,581,021 | 93.11       |
| tRNA   | 93,019    | 124,467   | 102,944   | 106,810   | 6.29        |
| snRNA  | 9,152     | 10,727    | 10,690    | 10,190    | 0.60        |
| snoRNA | 0         | 0         | 0         | 0         | 0           |

**Supplementary Table 20.** Energies of the conformers of compound (+)-alsophilin at B3LYP/6-311g (d,p) in MeOH.

| Label | Conformer                                                                           | Boltzmann weighting factor |
|-------|-------------------------------------------------------------------------------------|----------------------------|
| 1     | 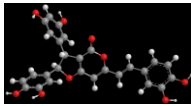   | 69.46                      |
| 2     |    | 28.87                      |
| 3     |    | 16.71                      |
| 4     |    | 14.75                      |
| 5     |   | 9.79                       |
| 6     |  | 7.63                       |
| 7     |  | 5.96                       |
| 8     |  | 5.68                       |
| 9     |  | 4.96                       |
| 10    |  | 4.46                       |
| 11    |  | 2.42                       |
| 12    |  | 1.61                       |
| 13    |  | 1.27                       |



**Supplementary Table 21.**  $^1\text{H}$  (500 MHz) and  $^{13}\text{C}$  NMR (125 MHz) spectral data of ( $\pm$ )-alsophilin in  $\text{CD}_3\text{OD}$ .

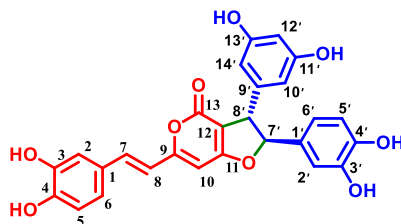

| No. | $\delta_{\text{H}}$ (mult, J in Hz) | $\delta_{\text{C}}$ | No.      | $\delta_{\text{H}}$ (mult, J in Hz) | $\delta_{\text{C}}$ |
|-----|-------------------------------------|---------------------|----------|-------------------------------------|---------------------|
| H1  |                                     | 128.7               | P1'      |                                     | 132.5               |
| H2  | 7.06 (d, 2.0)                       | 114.9               | P2'      | 6.76 (d, 2.0)                       | 113.8               |
| H3  |                                     | 146.8 <sup>a</sup>  | P3'      |                                     | 146.9 <sup>a</sup>  |
| H4  |                                     | 148.9               | P4'      |                                     | 147.3               |
| H5  | 6.78 (d, 8.5)                       | 116.6               | P5'      | 6.79 (d, 8.5)                       | 116.4               |
| H6  | 6.97 (dd, 8.5, 2.0)                 | 122.2               | P6'      | 6.66 (d, 8.5, 2.0)                  | 119.0               |
| H7  | 7.38 (d, 16.0)                      | 138.1               | P7'      | 5.43 (d, 6.5)                       | 97.8                |
| H8  | 6.70 (d, 16.0)                      | 117.0               | P8'      | 4.26 (d, 6.5)                       | 55.0                |
| H9  |                                     | 164.9               | P9'      |                                     | 144.7               |
| H10 | 6.43 (s)                            | 96.3                | P10'/14' | 6.12 (d, 2.5)                       | 106.7               |
| H11 |                                     | 173.8               | P11'/13' |                                     | 160.1               |
| H12 |                                     | 103.8               | P12'     | 6.18 (t, 2.5)                       | 102.6               |
| H13 |                                     | 163.1               |          |                                     |                     |

<sup>a</sup> Overlapping signals.

**Supplementary Table 22.** Antioxidant activities on MDA production of the bioactive compounds.

| Compound              | Inhibition rate (%) <sup>a</sup> | IC <sub>50</sub> values (μM) <sup>b</sup> |
|-----------------------|----------------------------------|-------------------------------------------|
| (±)-alsophilin        | 92.87±0.74                       | 3.42±1.22                                 |
| (-)-alsophilin        | 94.56±2.25                       | 2.21±0.14                                 |
| (+)-alsophilin        | 92.02±1.98                       | 3.53±0.30                                 |
| Piceatannol           | 97.74±1.00                       | 0.61±0.18                                 |
| Cyperusphenol B       | 96.81±2.49                       | 1.52±0.41                                 |
| Curcumin <sup>c</sup> | 98.58±0.61                       | 1.92±0.57                                 |

<sup>a</sup> Inhibition rate at 10<sup>-5</sup> M. <sup>b</sup> IC<sub>50</sub> values represent: mean ± SD (*n*=3 biologically independent experiments). <sup>c</sup> Positive control.
